# Supplementary material for: Hydroxynicotinic acid crystallisation and solubility systematic studies
Source: Royal Society of Chemistry journal article supplement (doi:10.1039/d2nj00627h), 2022-01-01
Supplement: d2nj00627h1.pdf [file d2nj00627h1.pdf]

Electronic Supplementary Information (ESI) for New Journal of Chemistry

**Hydroxynicotinic acids crystallisation and solubility systematic studies**

Catarina V. Esteves\*

Centro de Química Estrutural, Institute of Molecular Sciences, Faculdade de Ciências,

Universidade de Lisboa, 1749-016 Lisboa, Portugal

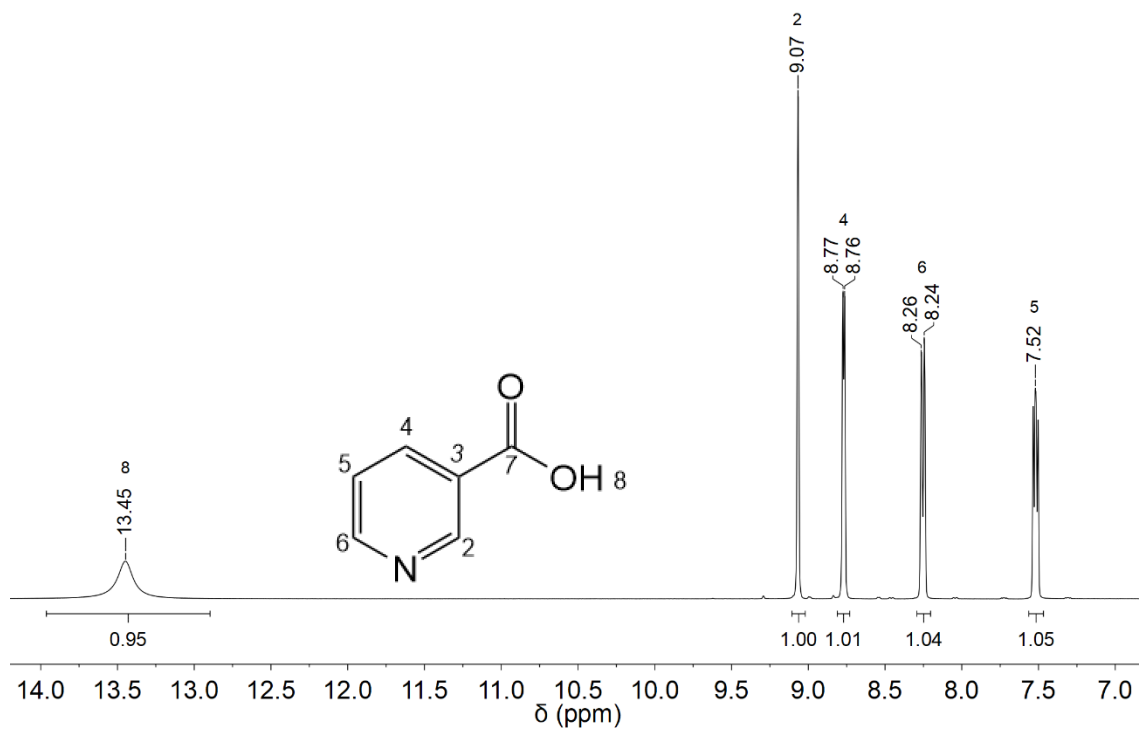

**Fig. S1.**  $^1\text{H}$  NMR spectrum of NA in  $\text{DMSO-}d_6$ .

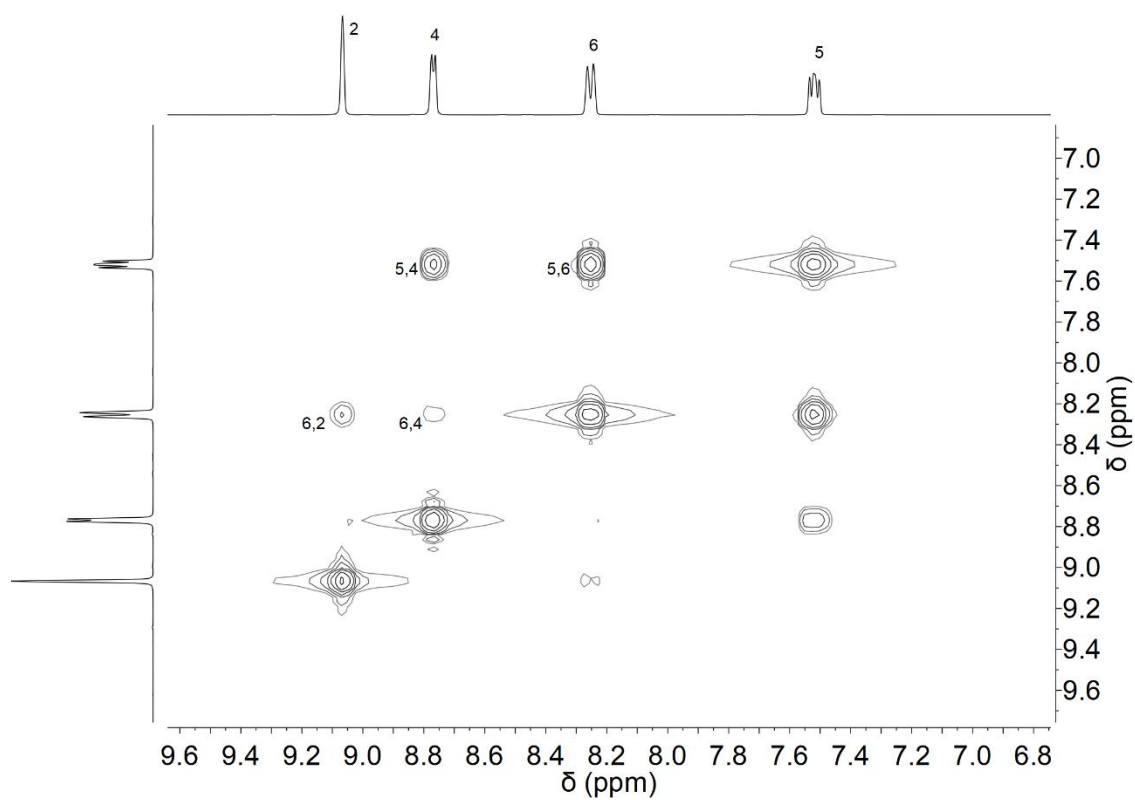

**Fig. S2.** COSY spectrum of NA in  $\text{DMSO-}d_6$ .

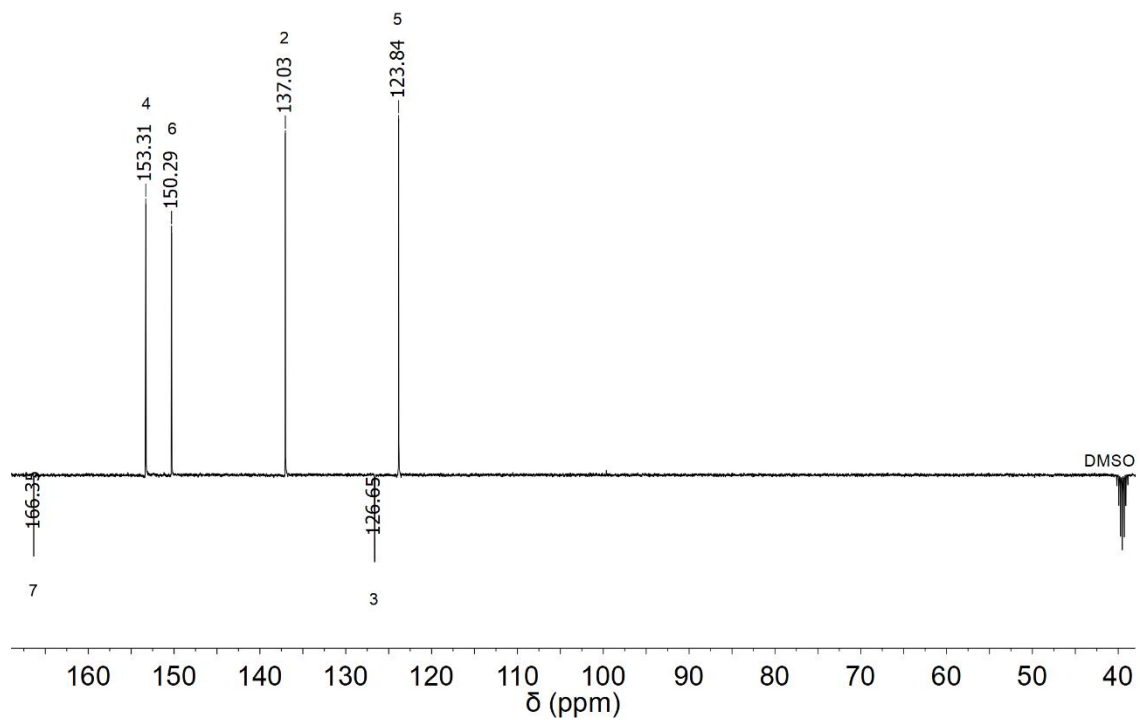

**Fig. S3.**  $^{13}\text{C}$ -APT spectrum of NA in  $\text{DMSO-}d_6$ .

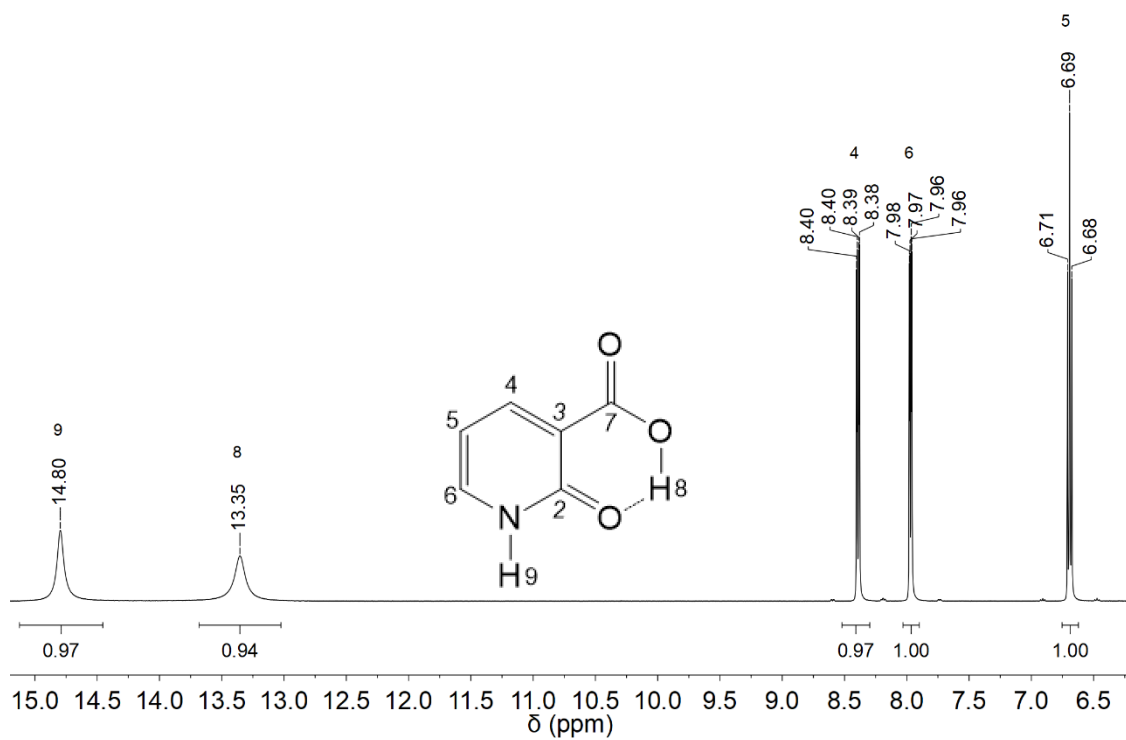

**Fig. S4.**  $^1\text{H}$  NMR spectrum of 2HNA in  $\text{DMSO-}d_6$ .

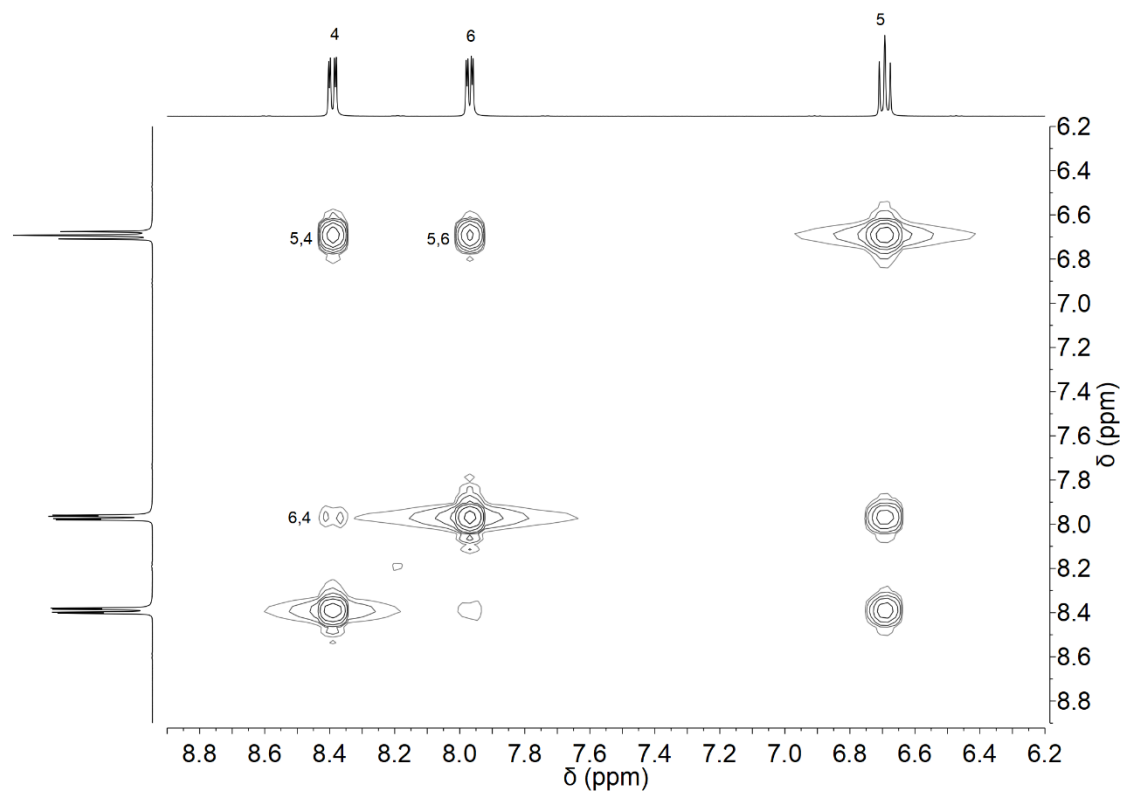

**Fig. S5.** COSY spectrum of 2HNA in DMSO- $d_6$ .

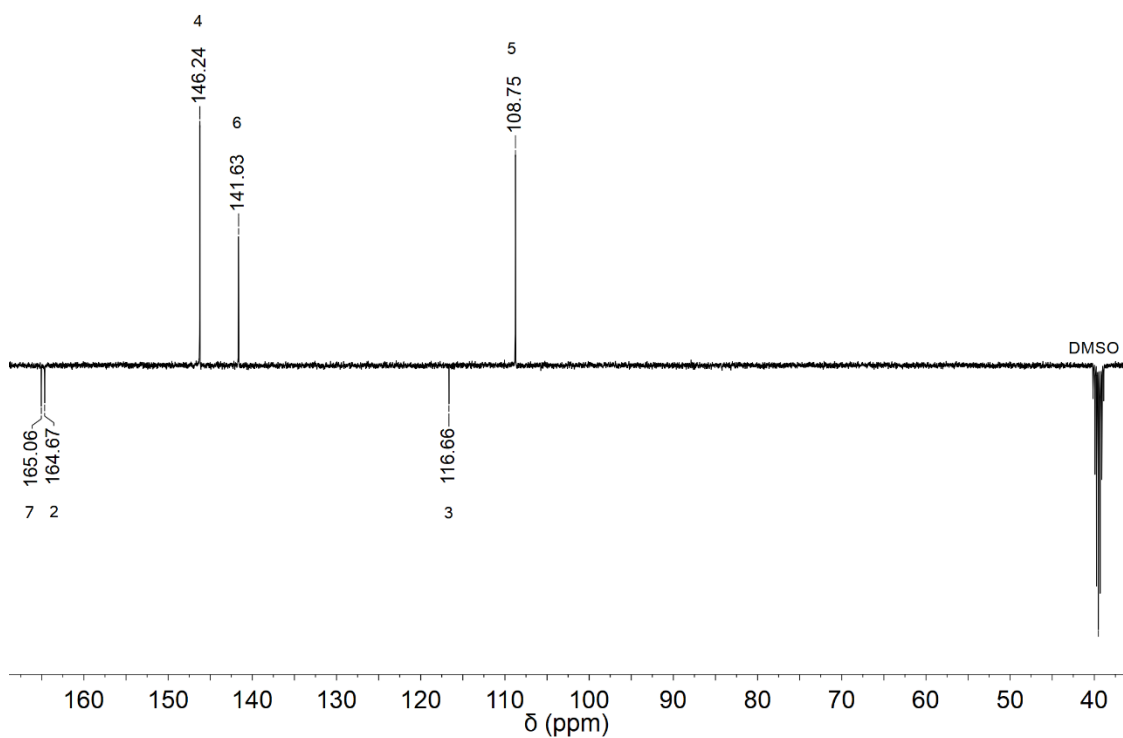

**Fig. S6.**  $^{13}\text{C}$ -APT spectrum of 2HNA in DMSO- $d_6$ .

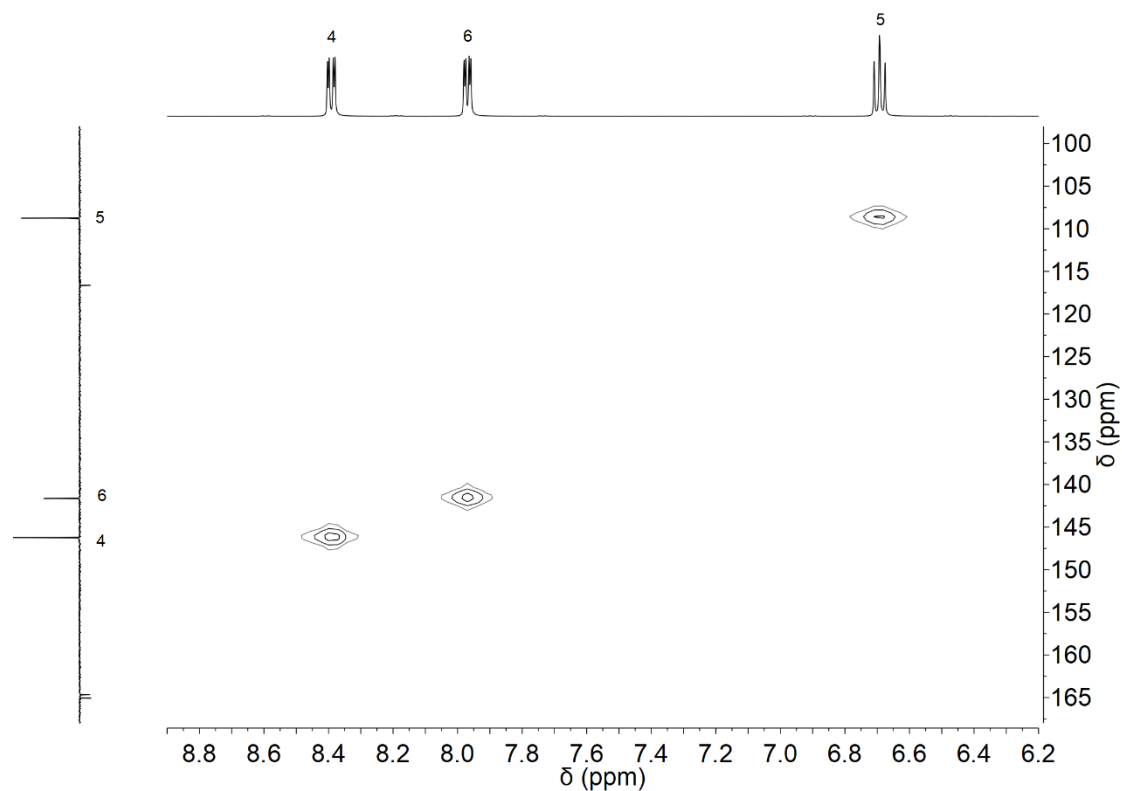

**Fig. S7.** HMQC spectrum of 2HNA in DMSO- $d_6$ .

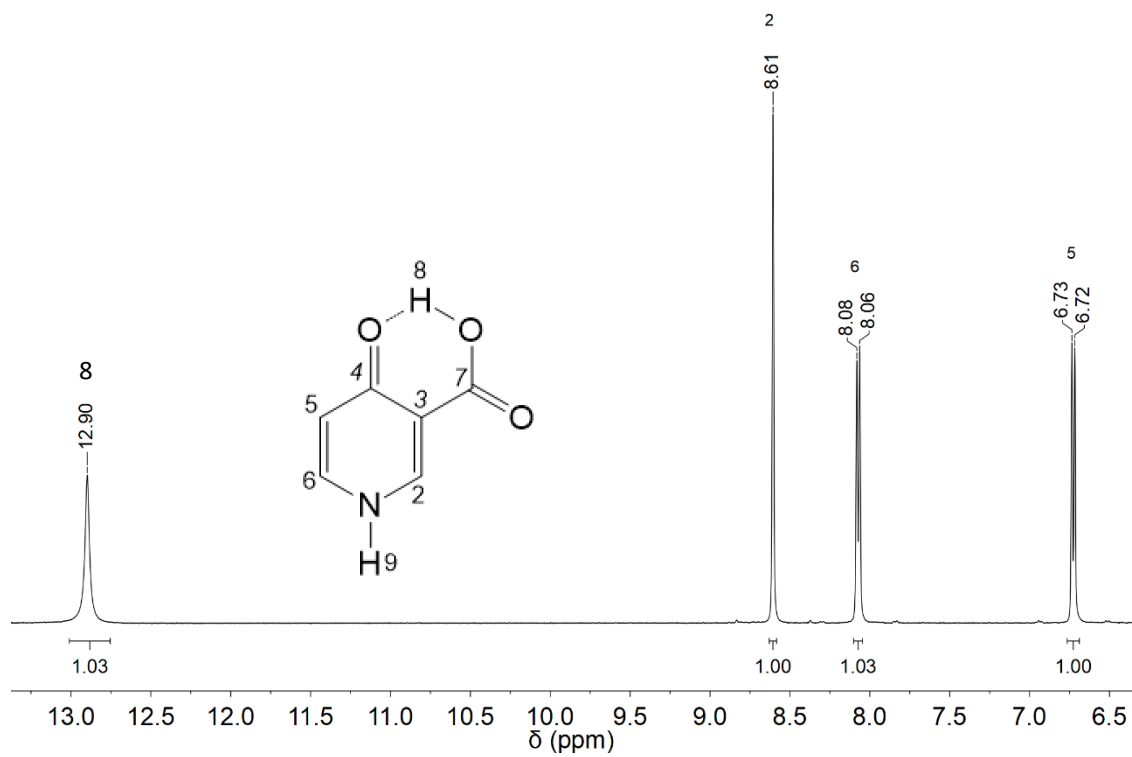

**Fig. S8.**  $^1\text{H}$  NMR spectrum of 4HNA in DMSO- $d_6$ .

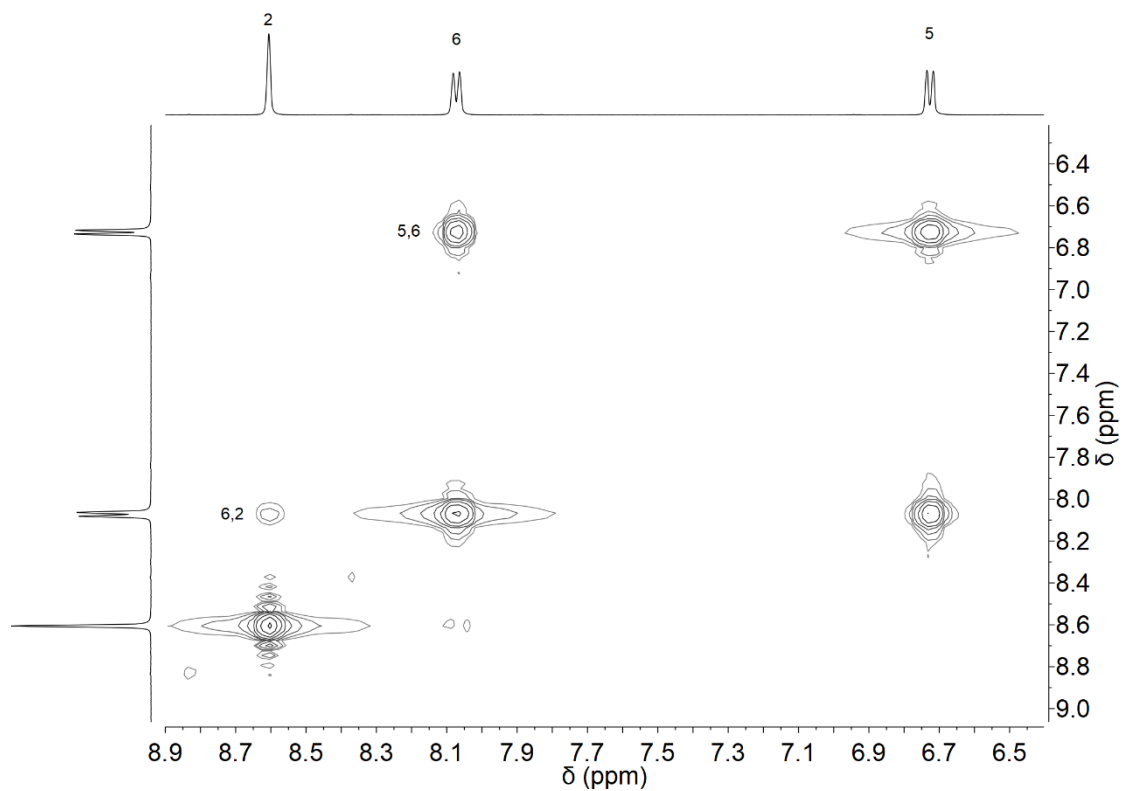

**Fig. S9.** COSY spectrum of 4HNA in DMSO- $d_6$ .

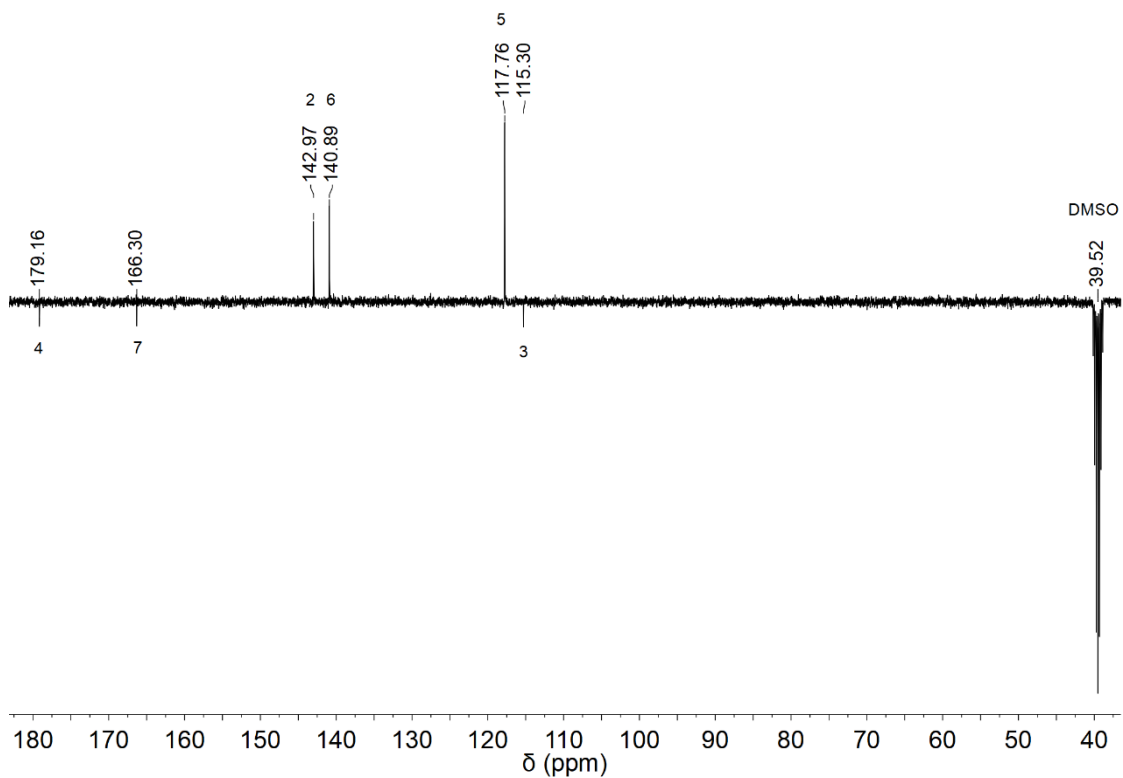

**Fig. S10.**  $^{13}\text{C}$ -APT spectrum of 4HNA in DMSO- $d_6$ .

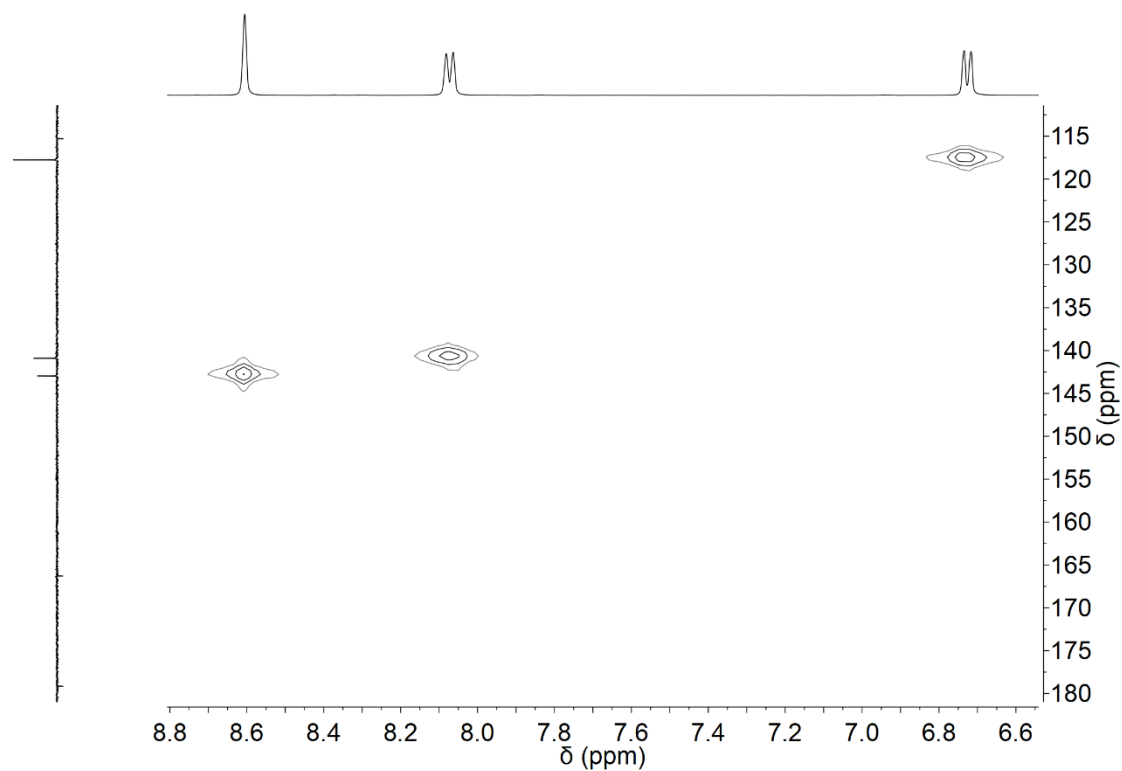

**Fig. S11.** HMQC spectrum of 4HNA in DMSO- $d_6$ .

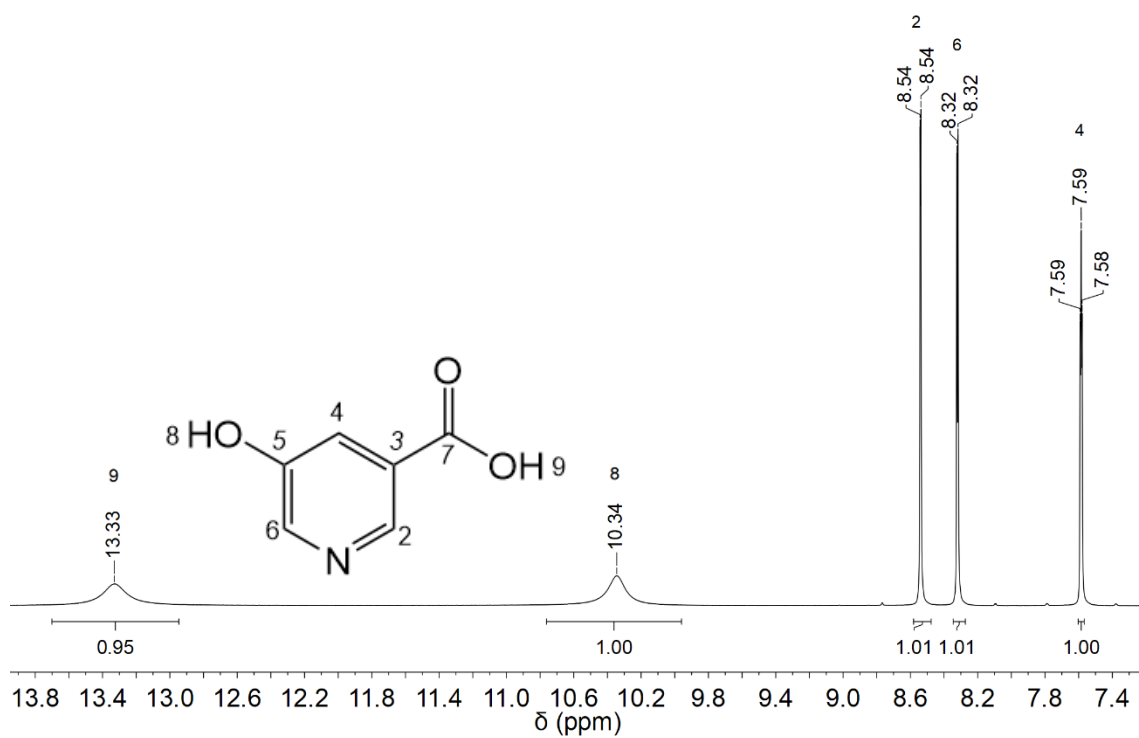

**Fig. S12.**  $^1\text{H}$  NMR spectrum of 5HNA in DMSO- $d_6$ .

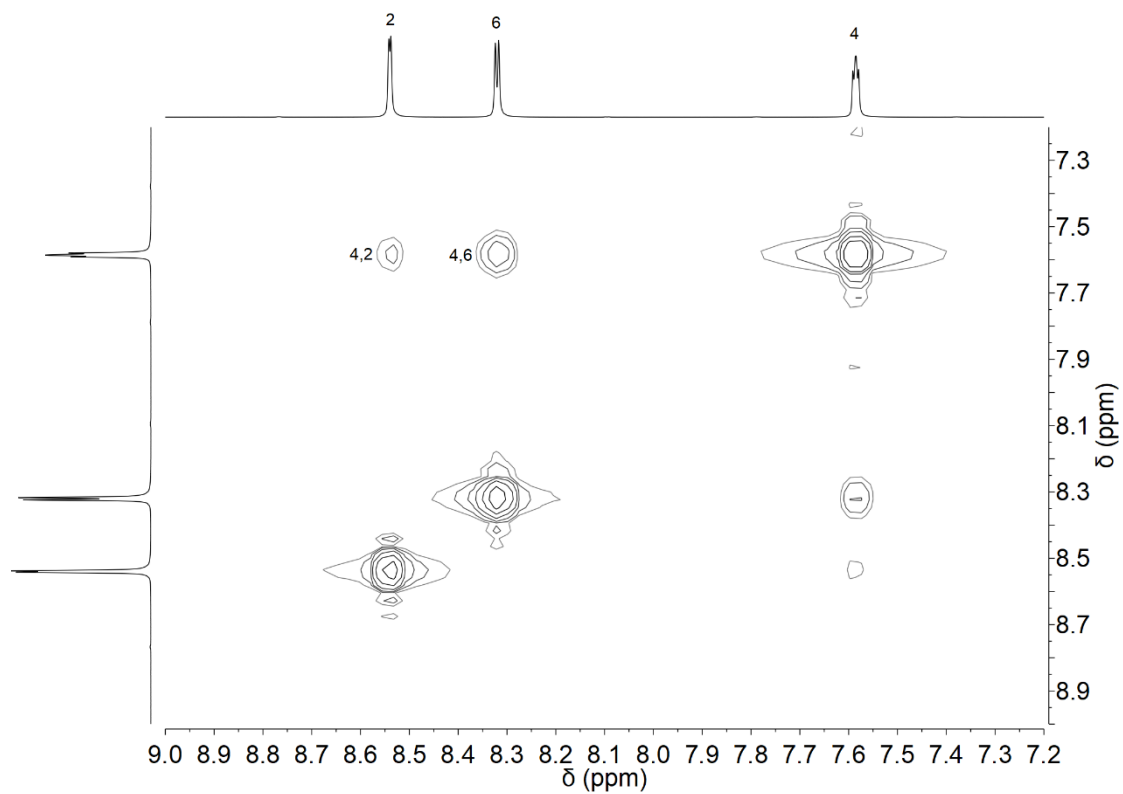

**Fig. S13.** COSY spectrum of 5HNA in DMSO-*d*<sub>6</sub>.

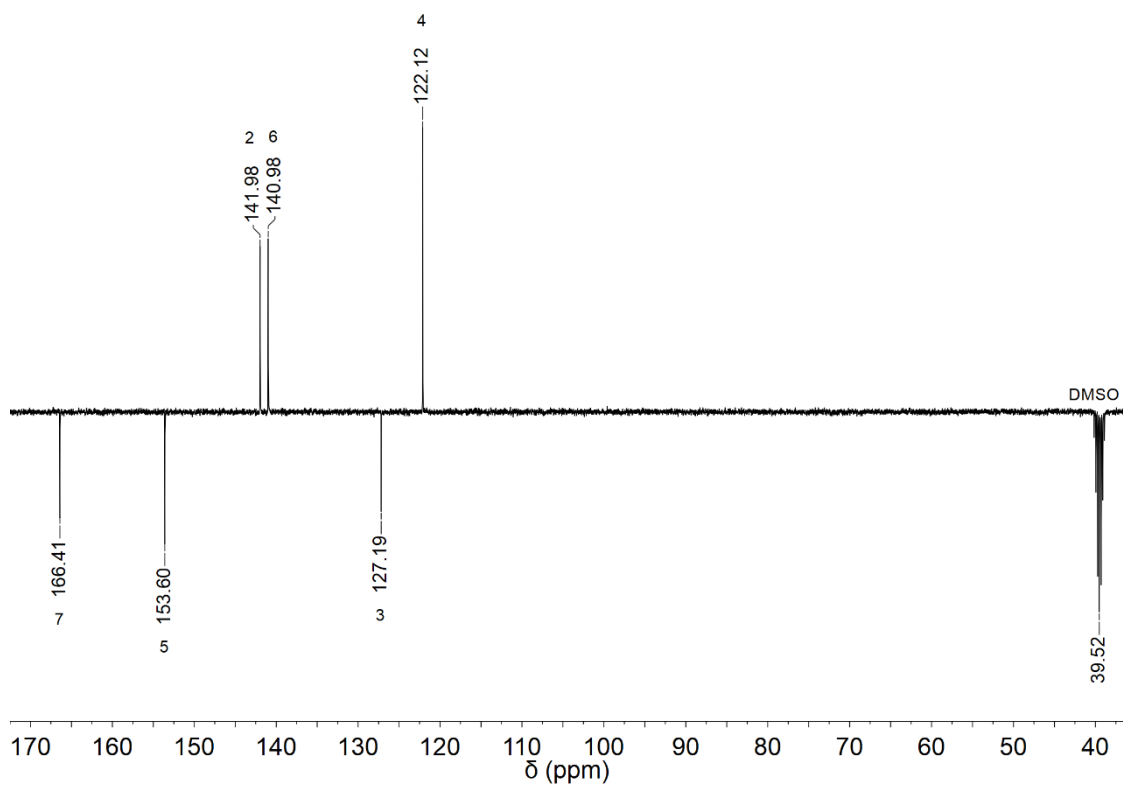

**Fig. S14.** <sup>13</sup>C-APT spectrum of 5HNA in DMSO-*d*<sub>6</sub>.



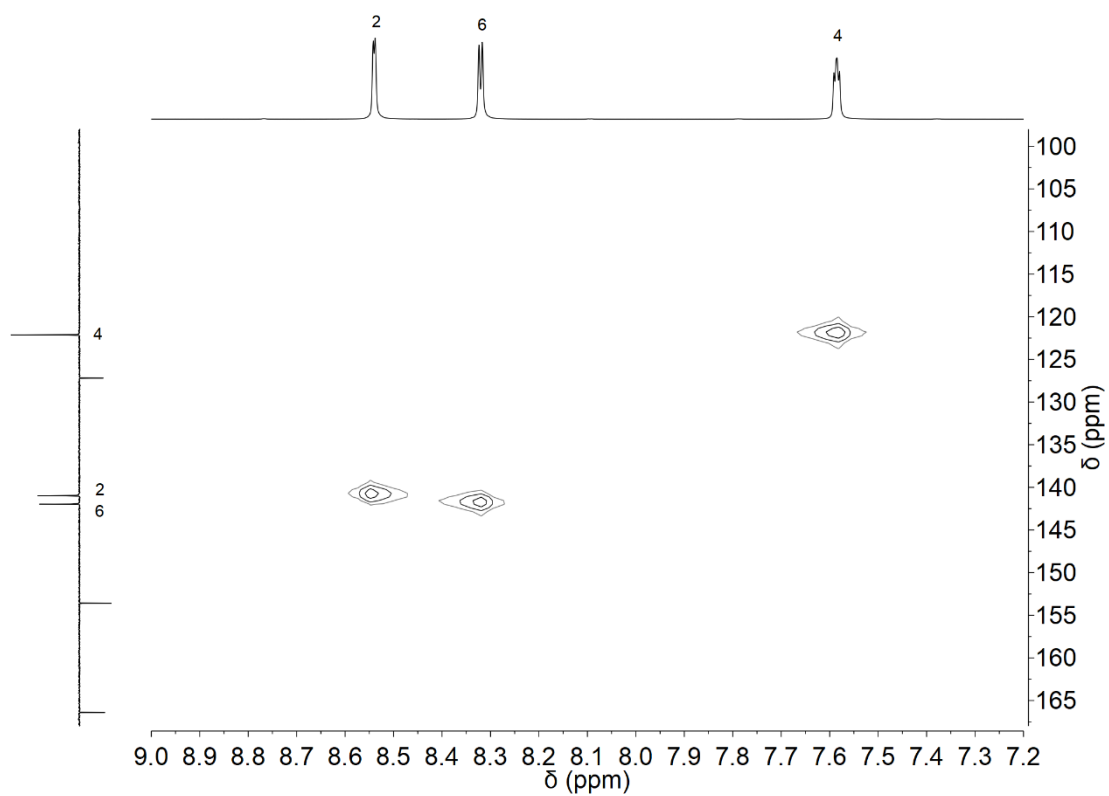

**Fig. S15.** HMQC spectrum of 5HNA in DMSO- $d_6$ .

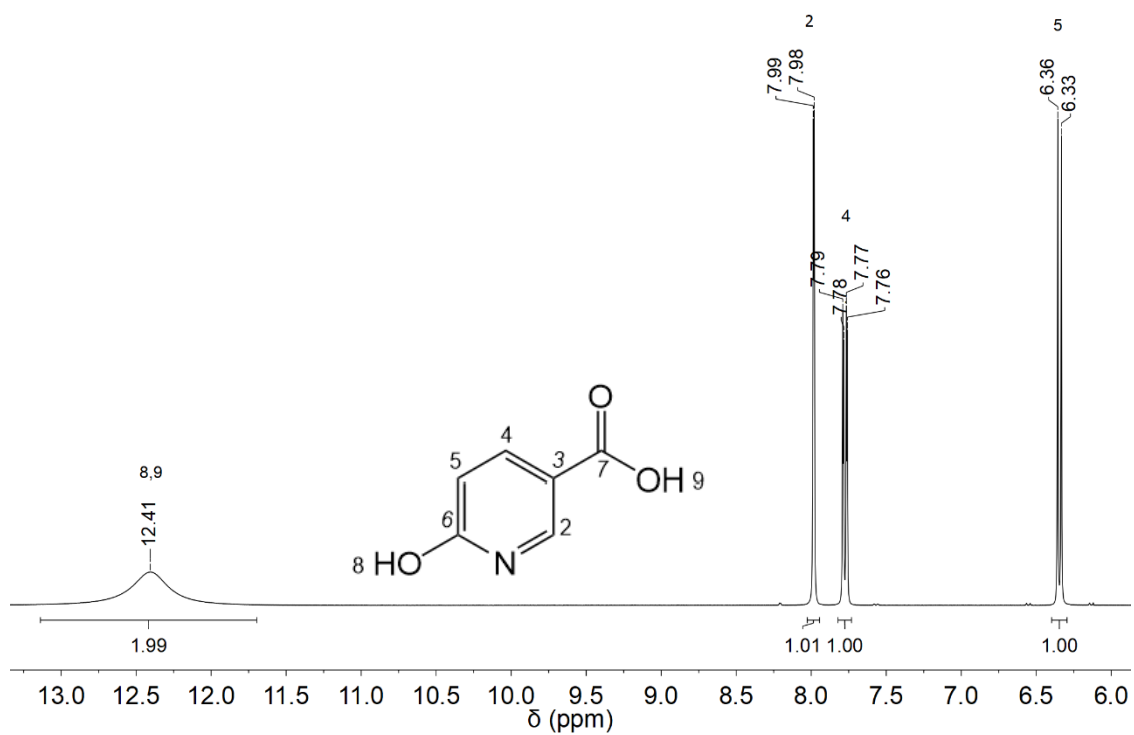

**Fig. S16.**  $^1\text{H}$  NMR spectrum of 6HNA in DMSO- $d_6$ .

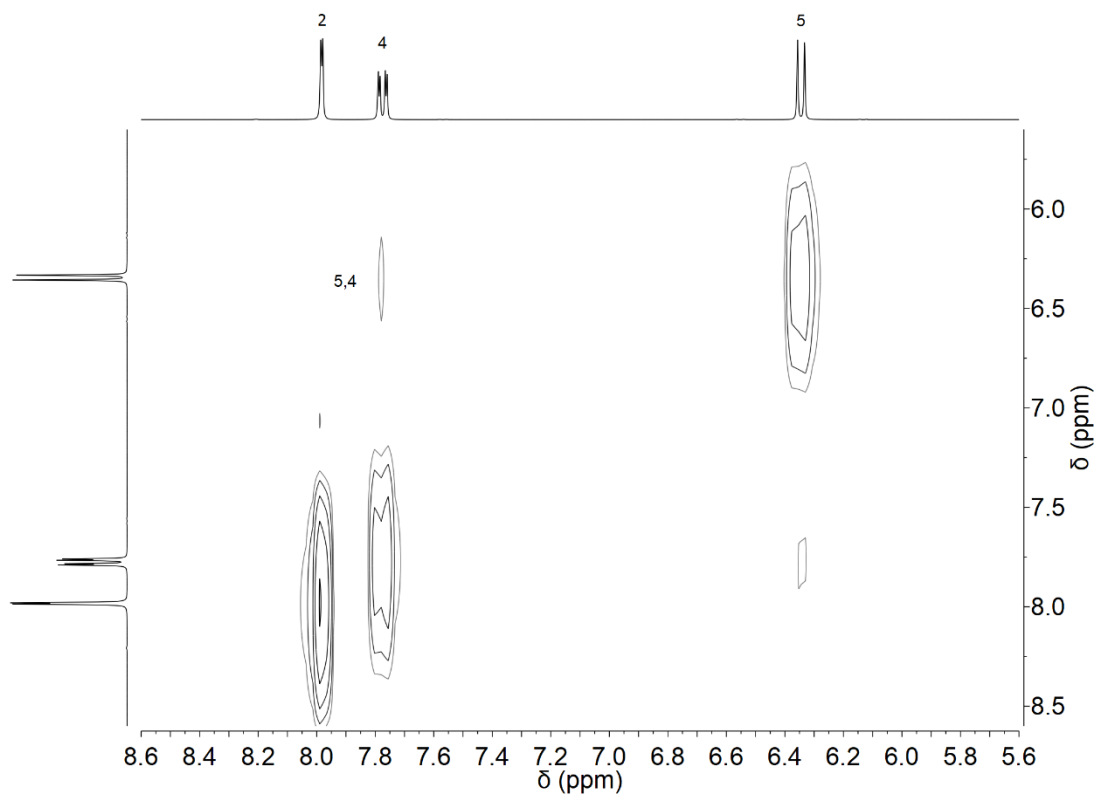

**Fig. S17.** COSY spectrum of 6HNA in DMSO-*d*<sub>6</sub>.

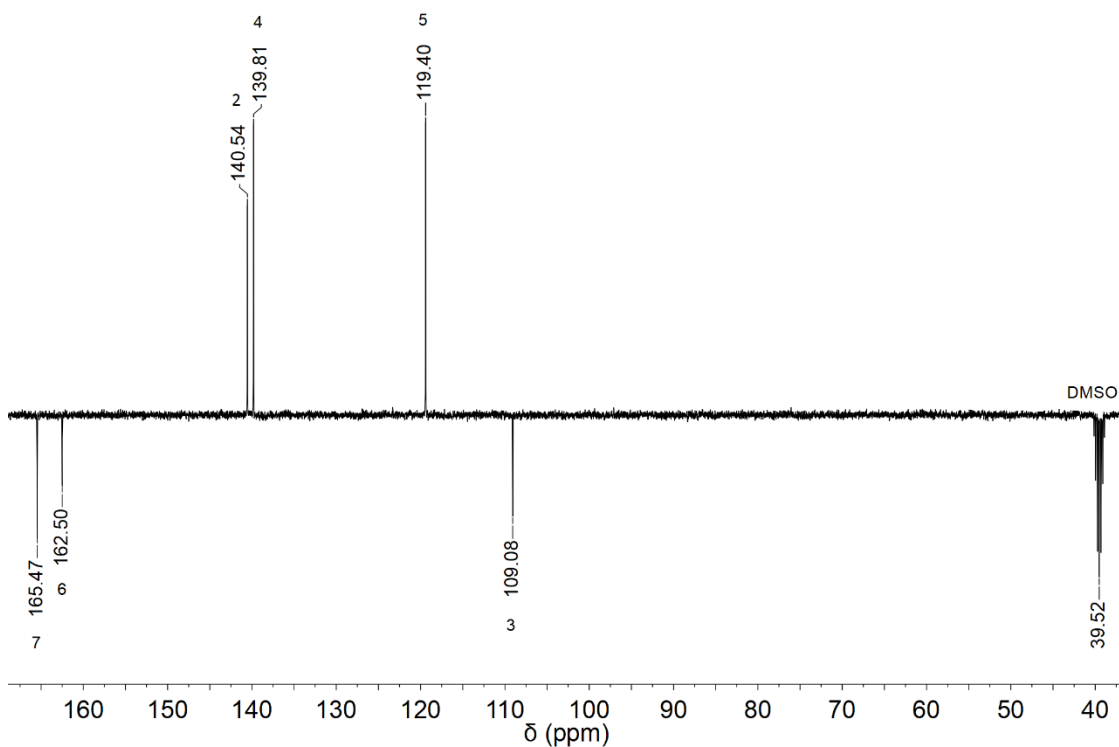

**Fig. S18.** <sup>13</sup>C-APT spectrum of 6HNA in DMSO-*d*<sub>6</sub>.

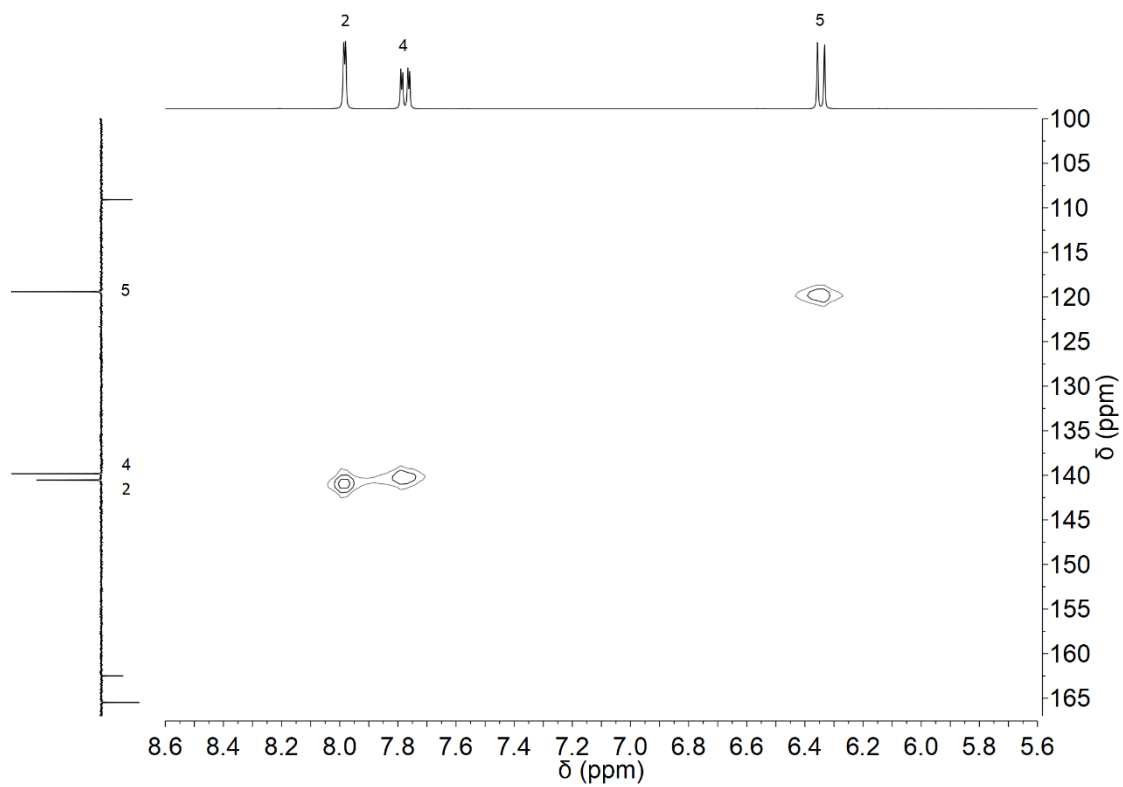

**Fig. S19.** HMQC spectrum of 6HNA in DMSO-*d*<sub>6</sub>.



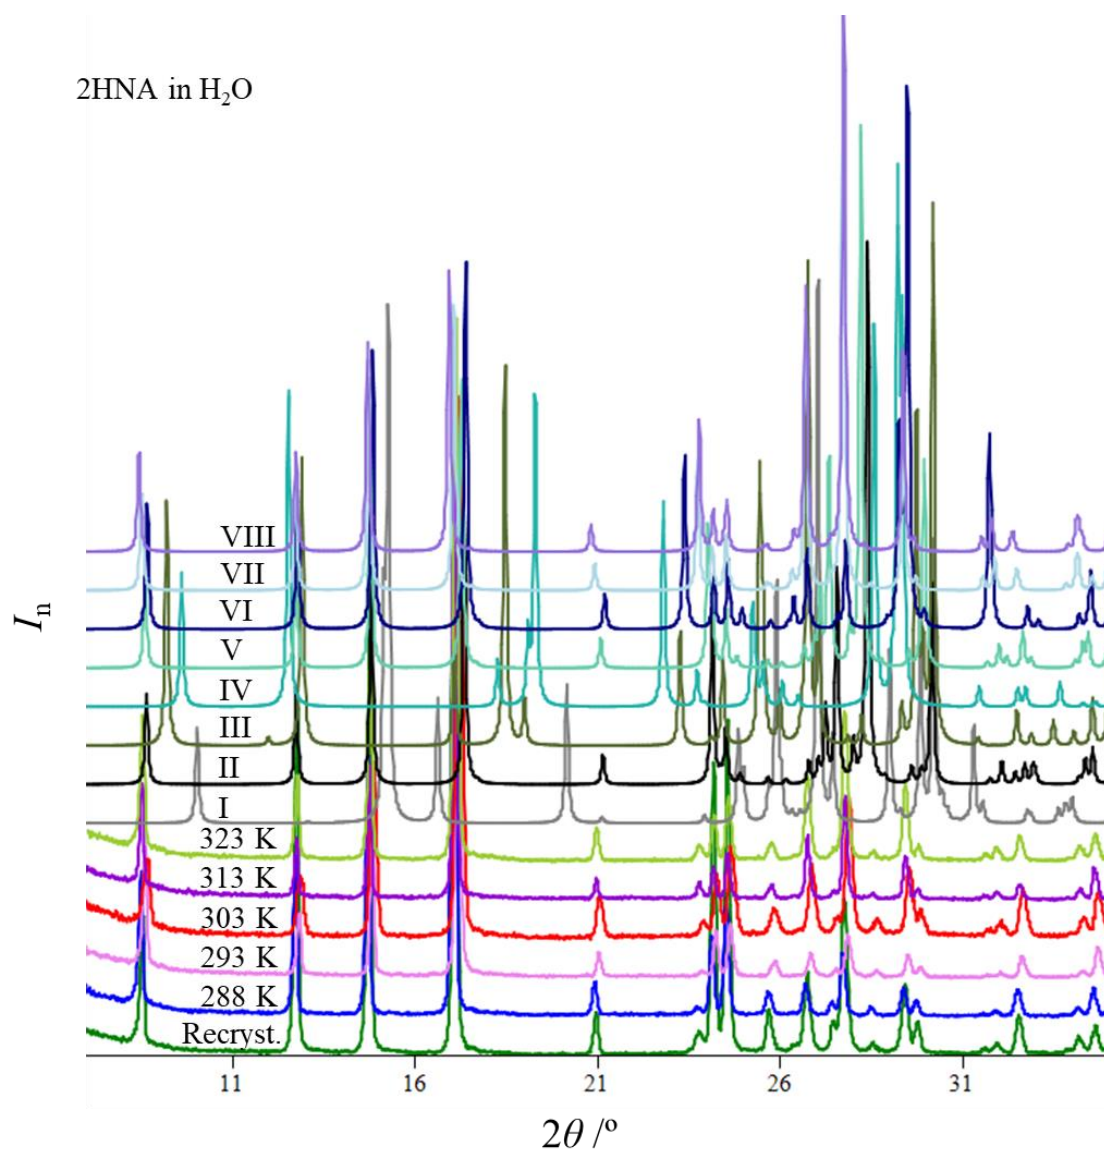

**Fig. S20.** Comparison of X-ray diffraction patterns obtained at room temperature for the recrystallized 2HNA (bottom), the powders obtained during the solubility experiment performed in H<sub>2</sub>O (middle patterns matching form VIII, the stabilization temperatures used in the slurry in equilibrium with the saturated solution are specified), and the patterns from the literature polymorph structures (top, for references see Table 2 in the manuscript). All the diffractograms were normalized to the peak of highest intensity ( $I_n$ ) and plotted using EasyGraphII [1].

4HNA in H<sub>2</sub>O

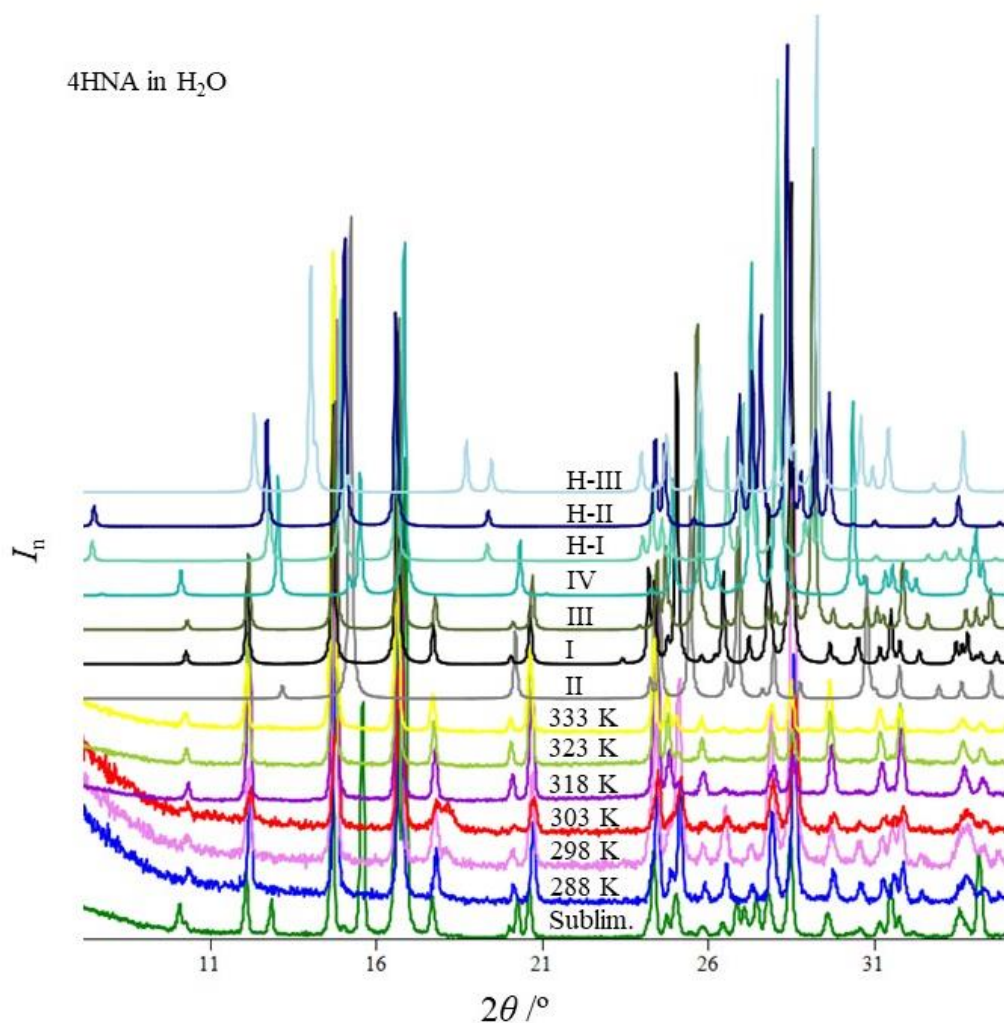

**Fig. S21.** Comparison of X-ray diffraction patterns obtained at room temperature for the sublimed 4HNA (bottom), the powders obtained during the solubility experiment performed in H<sub>2</sub>O (middle patterns matching form I, the stabilization temperatures used in the slurry in equilibrium with the saturated solution are specified), and the patterns from the literature polymorph and hydrate structures (top, for references see Table 2). All the diffractograms were normalized to the peak of highest intensity ( $I_n$ ) and plotted using EasyGraphII [1].

5HNA in H<sub>2</sub>O

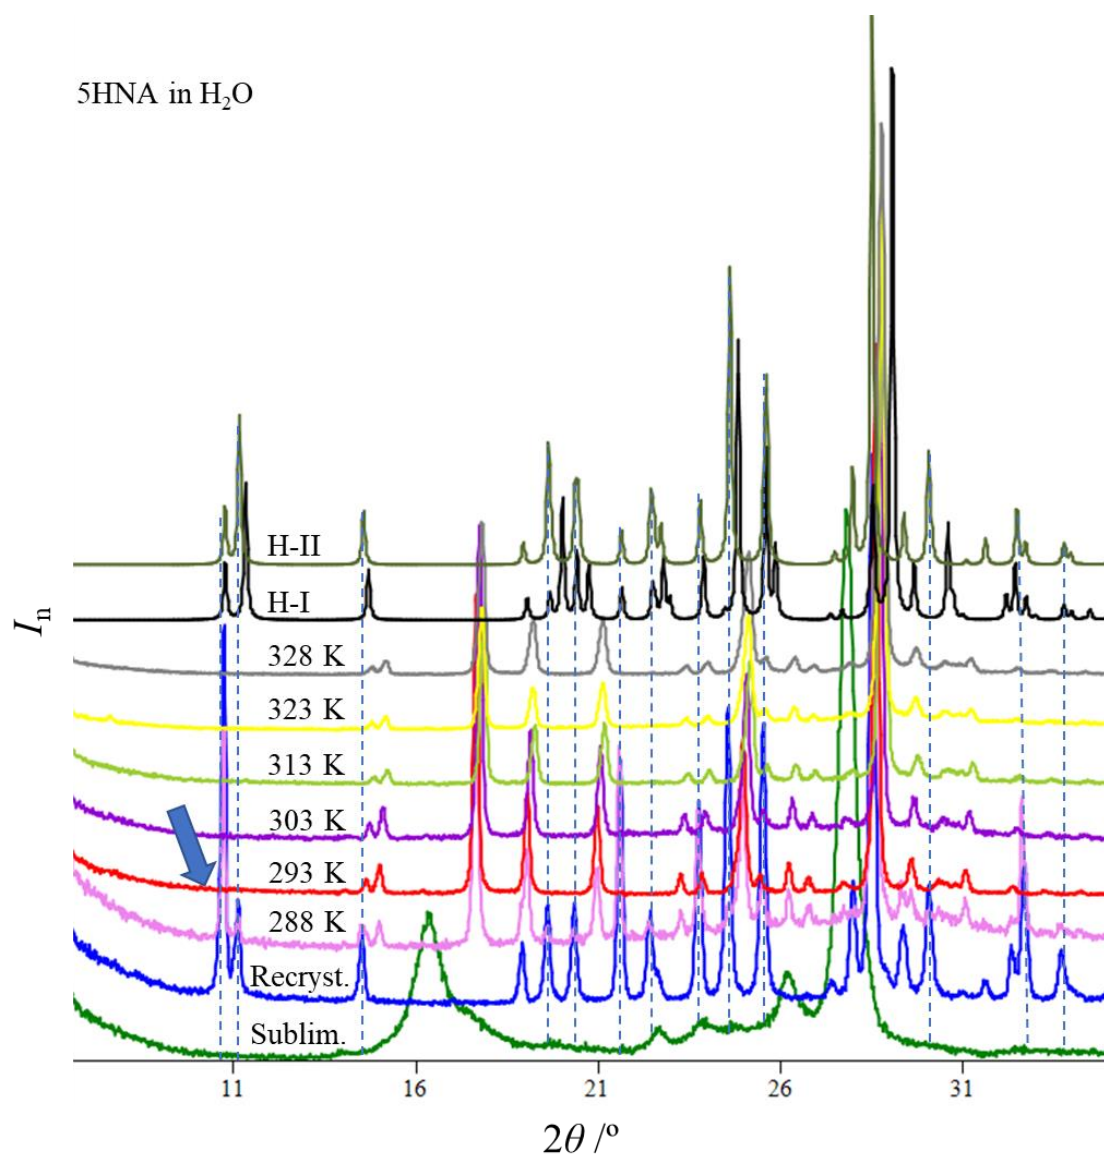

**Fig. S22.** Comparison of X-ray diffraction patterns obtained at room temperature for both sublimed and recrystallized 5HNA, bottom pattern, the powders obtained during the solubility experiment performed in H<sub>2</sub>O, middle patterns, the stabilization temperatures used in the slurry in equilibrium with the saturated solution are specified, and the patterns from the hydrate from the literature [2] (top). All the diffractograms were normalized to the peak of highest intensity ( $I_n$ ) and plotted using EasyGraphII [1].

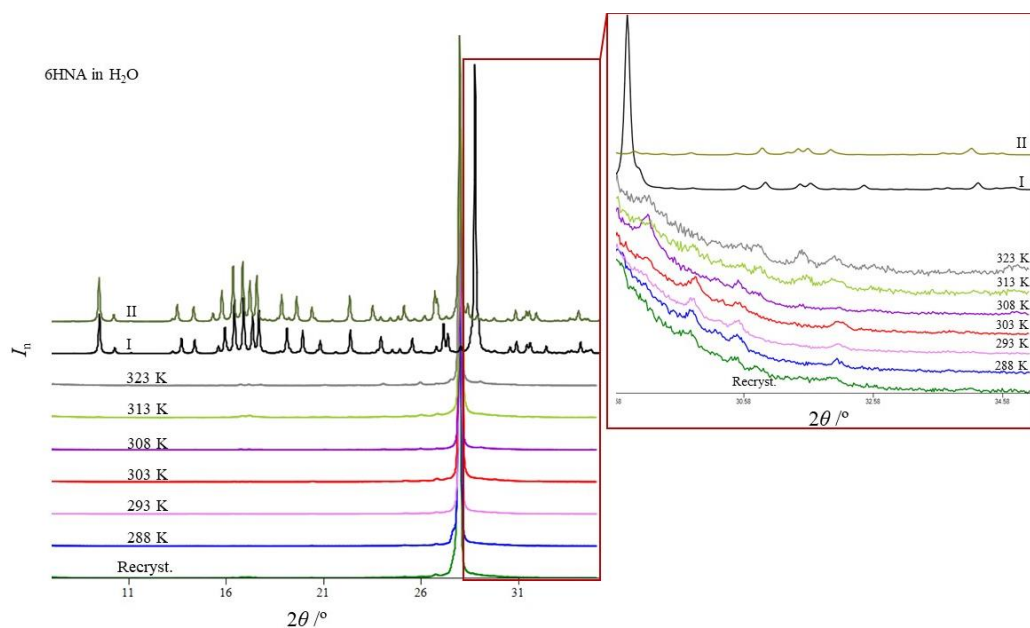

**Fig. S23.** Comparison of X-ray diffraction patterns obtained at room temperature for the recrystallized 6HNA (bottom), the powders obtained during the solubility experiment performed in H<sub>2</sub>O (middle patterns matching form II, the stabilization temperatures used in the slurry in equilibrium with the saturated solution are specified), and the patterns from the literature polymorph structures (top, for references see Table 1). A zoom was added focusing on the region above the observed preferential orientation ( $2\theta = 28.0$ ) to ensure that at  $2\theta = 28.8$  no peak was found, corroborating that the patterns obtained were in form II. All the diffractograms were normalized to the peak of highest intensity ( $I_n$ ) and plotted using EasyGraphII [1].



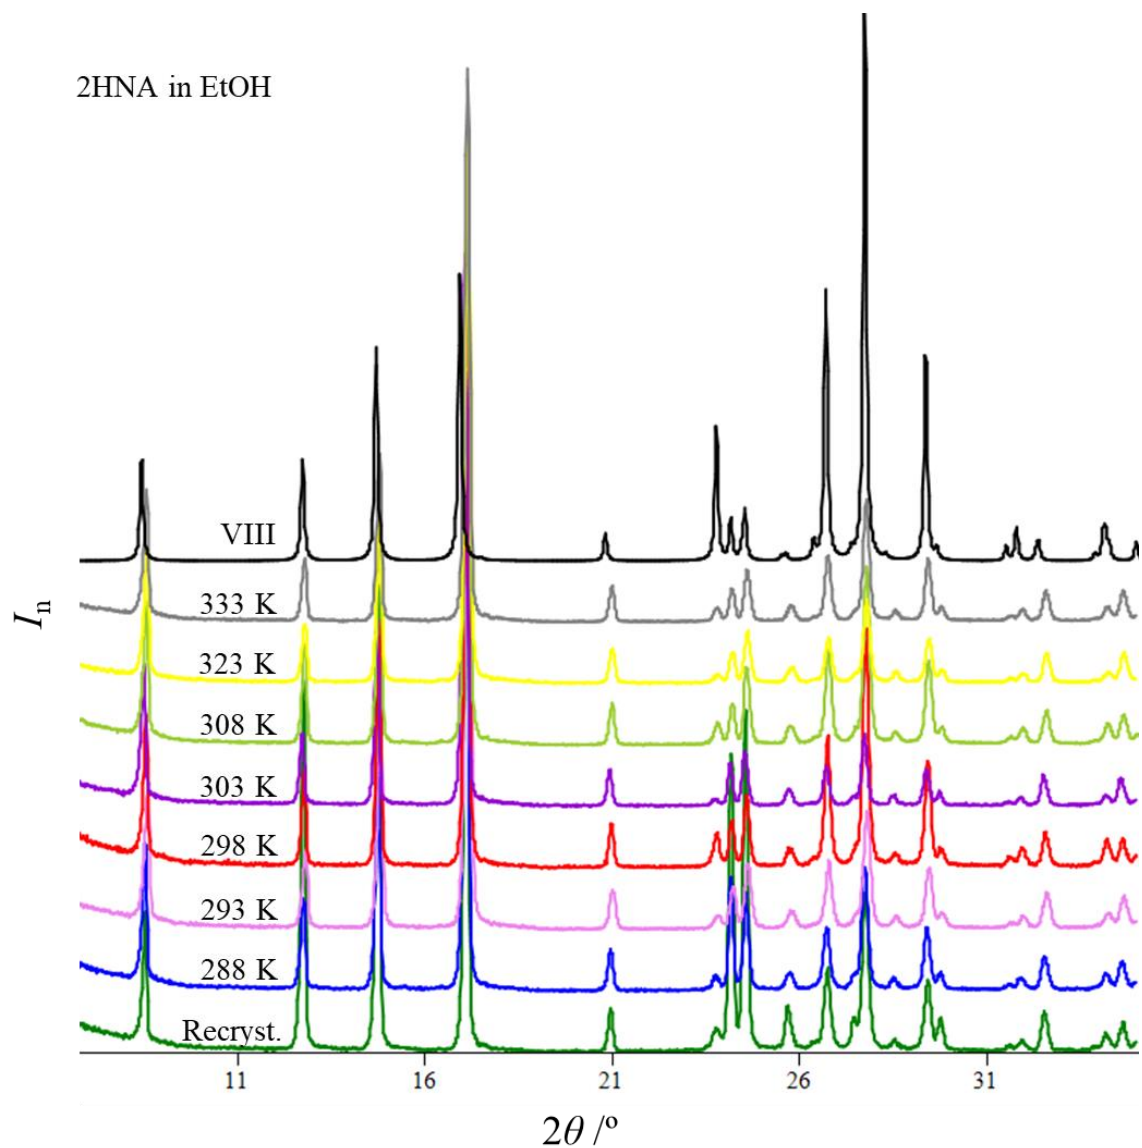

**Fig. S24.** Comparison of X-ray diffraction patterns obtained at room temperature for the recrystallized 2HNA (bottom), the powders obtained during the solubility experiment performed in EtOH (middle patterns matching form VIII, the stabilization temperatures used in the slurry are specified), and the pattern from the literature matching structure [3] (top). All the diffractograms were normalized to the peak of highest intensity ( $I_n$ ) and plotted using EasyGraphII [1].

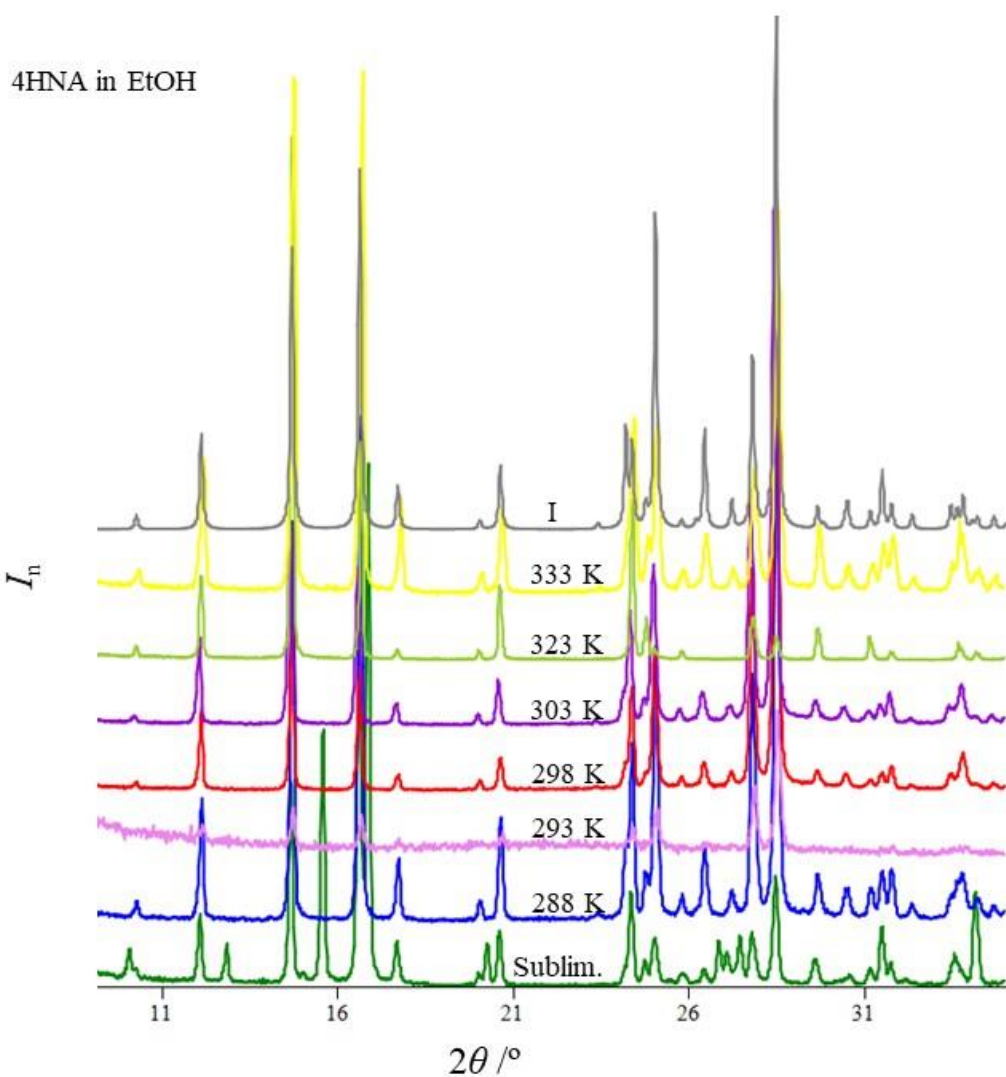

**Fig. S25.** Comparison of X-ray diffraction patterns obtained at room temperature for the sublimed 4HNA (bottom), the powders obtained during the solubility experiment performed in EtOH (middle patterns matching form I, the stabilization temperatures used in the slurry are specified), and the pattern from the literature matching structure [3] (top). All the diffractograms were normalized to the peak of highest intensity ( $I_n$ ) and plotted using EasyGraphII [1].

5HNA in EtOH

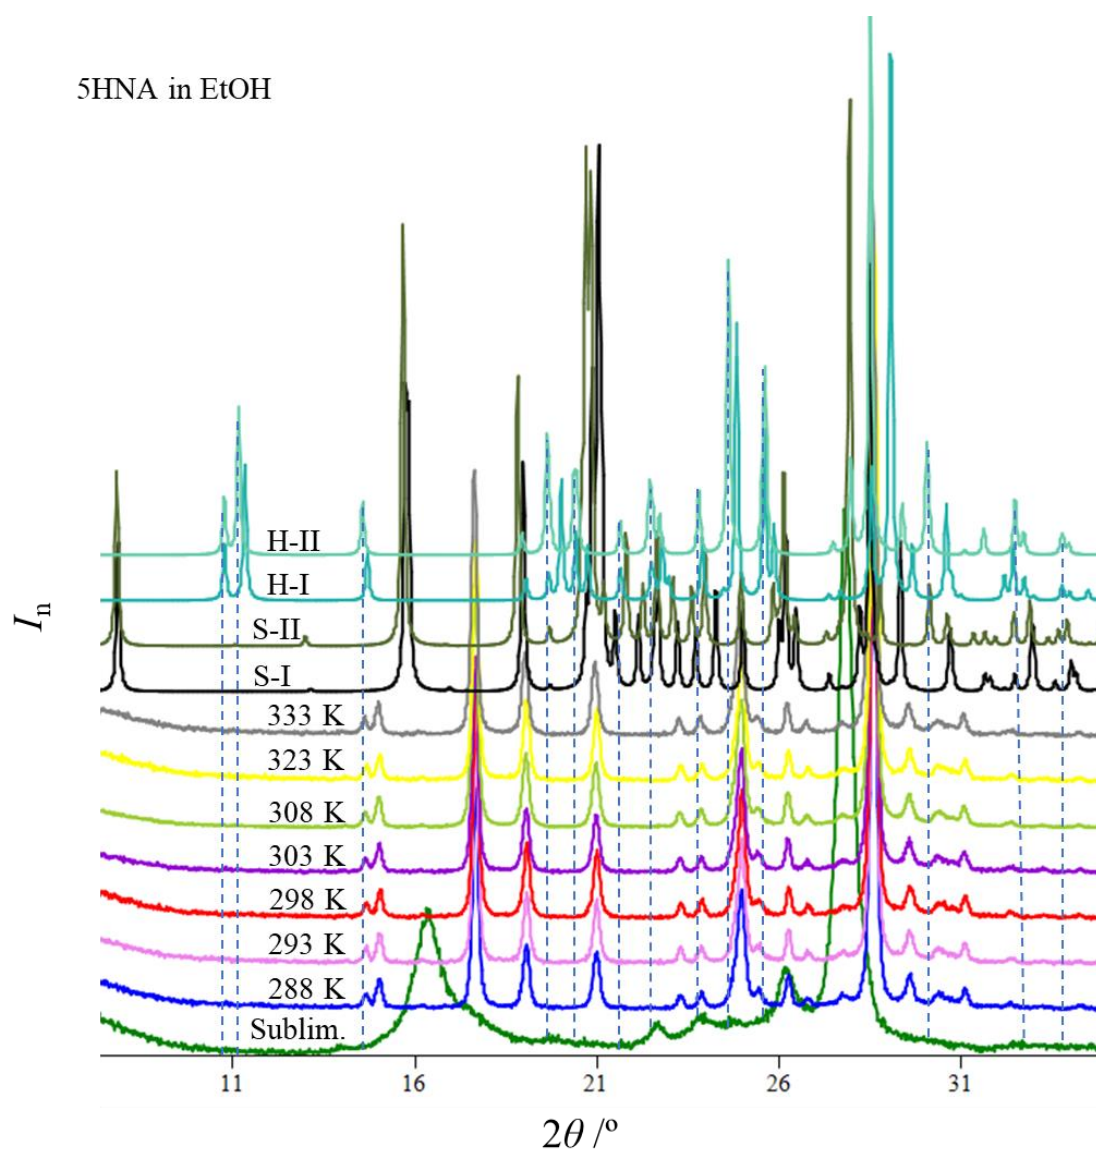

**Fig. S26.** Comparison of X-ray diffraction patterns obtained at room temperature for the sublimed 5HNA (bottom), the powders obtained during the solubility experiment performed in EtOH (middle patterns, the stabilization temperatures used in the slurry are specified), and the patterns from the hydrate and DMSO-solvate structures from our group already in the literature [2] (top). All the diffractograms were normalized to the peak of highest intensity ( $I_n$ ) and plotted using EasyGraphII [1].

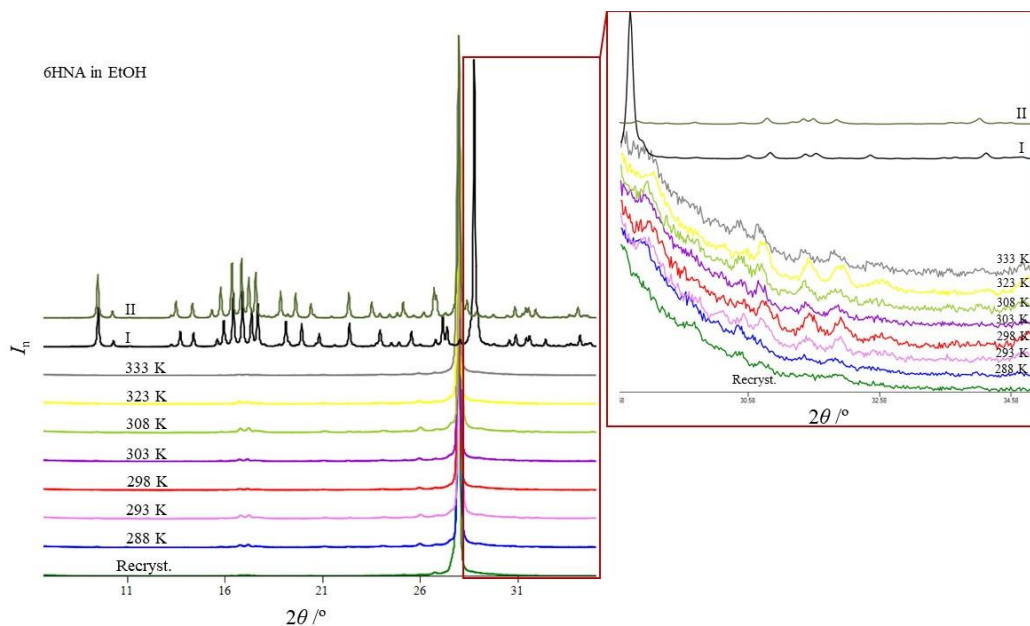

**Fig. S27.** Comparison of X-ray diffraction patterns obtained at room temperature for the recrystallized 6HNA (bottom), the powders obtained during the solubility experiment performed in EtOH (middle patterns matching form II, the stabilization temperatures used in the slurry are specified), and the patterns from the literature polymorph structures (top, for references see Table 1). A zoom was added focusing on the region above the observed preferential orientation ( $2\theta = 28.0$ ) to ensure that at  $2\theta = 28.8$  no peak was found, corroborating that the patterns obtained were in form II. All the diffractograms were normalized to the peak of highest intensity ( $I_n$ ) and plotted using EasyGraphII [1].

**Table S2**

Indexation of the X-Ray Powder Diffraction Pattern of 2HNA·H<sub>2</sub>O Recorded at 295±2 K, in the Range  $7^\circ \leq 2\theta \leq 35^\circ$ ; Space Group  $P2_1/n$ ; a = 3.810(1) Å, b = 7.370(2) Å, c = 20.749(6) Å,  $\beta = 89.96(9)$ .

| <i>h</i> | <i>k</i> | <i>l</i> | $2\theta(\text{Obs})^\circ$ | $2\theta(\text{Calc})^\circ$ |
|----------|----------|----------|-----------------------------|------------------------------|
| 0        | 0        | 2        | 8.520                       | 8.524                        |
| 0        | 1        | 1        | 12.755                      | 12.747                       |
| 0        | 1        | 2        | 14.740                      | 14.745                       |
| 0        | 0        | 4        | 17.095                      | 17.095                       |
| 0        | 1        | 4        | 20.950                      | 20.943                       |
| -1       | 0        | 1        | 23.755                      | 23.746                       |
| 0        | 2        | 0        | 24.165                      | 24.153                       |
| 0        | 2        | 1        | 24.530                      | 24.537                       |
| 0        | 2        | 2        | 25.665                      | 25.656                       |
| -1       | 0        | 3        | 26.720                      | 26.721                       |
| 0        | 2        | 3        | 27.445                      | 27.426                       |
| 1        | 1        | 2        | 27.710                      | 27.720                       |
| 0        | 1        | 6        | 28.505                      | 28.513                       |
| -1       | 1        | 3        | 29.385                      | 29.388                       |
| 0        | 2        | 4        | 29.750                      | 29.741                       |
| 1        | 0        | 5        | 31.880                      | 31.875                       |
| 0        | 2        | 5        | 32.450                      | 32.496                       |
| 0        | 1        | 7        | 32.545                      | 32.562                       |
| 1        | 1        | 5        | 34.175                      | 34.176                       |
| 0        | 0        | 8        | 34.615                      | 34.586                       |

**Table S3**

Indexation of the X-Ray Powder Diffraction Pattern of 6HNA Recorded at 295±2 K, in the Range  $7^\circ \leq 2\theta \leq 35^\circ$ ; Space Group *P*-1;  $a = 6.9975(1) \text{ \AA}$ ,  $b = 11.2333(2) \text{ \AA}$ ,  $c = 16.2909(4) \text{ \AA}$ ,  $\beta = 78.36(2)$ .

| <i>h</i> | <i>k</i> | <i>l</i> | $2\theta(\text{Obs})/^\circ$ | $2\theta(\text{Calc})/^\circ$ |
|----------|----------|----------|------------------------------|-------------------------------|
| 0        | 1        | 1        | 9.420                        | 9.476                         |
| 1        | 0        | 1        | 13.440                       | 13.457                        |
| -1       | 0        | 1        | 15.305                       | 15.277                        |
| 0        | -2       | 0        | 16.370                       | 16.352                        |
| 0        | 2        | 1        | 16.855                       | 16.827                        |
| 1        | -1       | 0        | 17.115                       | 17.145                        |
| 1        | -1       | 1        | 17.530                       | 17.514                        |
| -1       | -2       | 1        | 20.370                       | 20.424                        |
| -1       | -1       | 3        | 24.055                       | 24.043                        |
| 1        | 3        | 0        | 25.180                       | 25.155                        |
| -1       | -3       | 1        | 26.735                       | 26.743                        |
| 2        | 2        | 0        | 27.975                       | 27.964                        |
| 0        | 3        | 3        | 28.685                       | 28.693                        |
| 1        | 2        | 5        | 30.455                       | 30.451                        |

**Table S4**

Microscopy images and SEM images of the HNA starting materials used in this work.

Sample

2HNA recrystallized from water

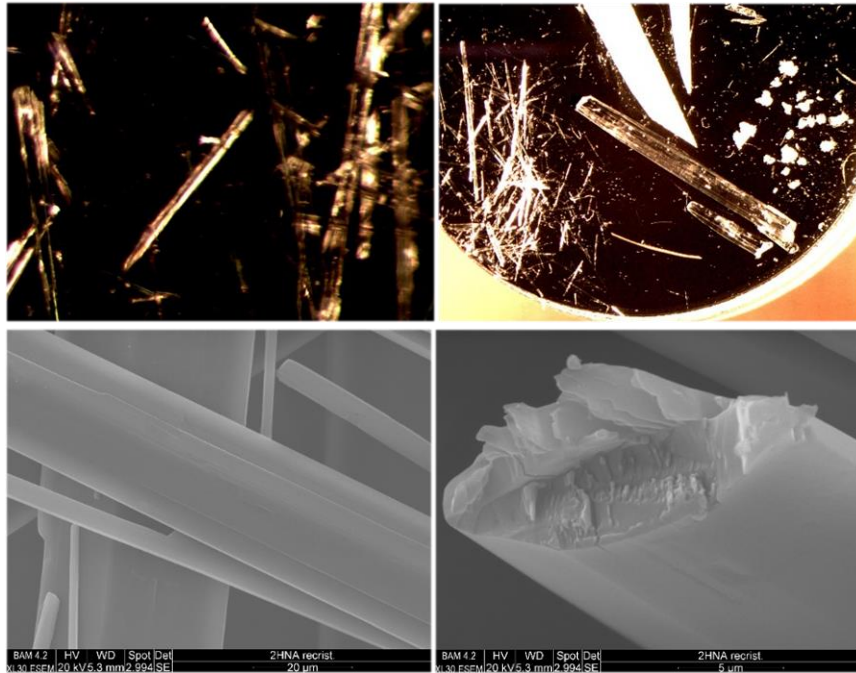

4HNA sublimed

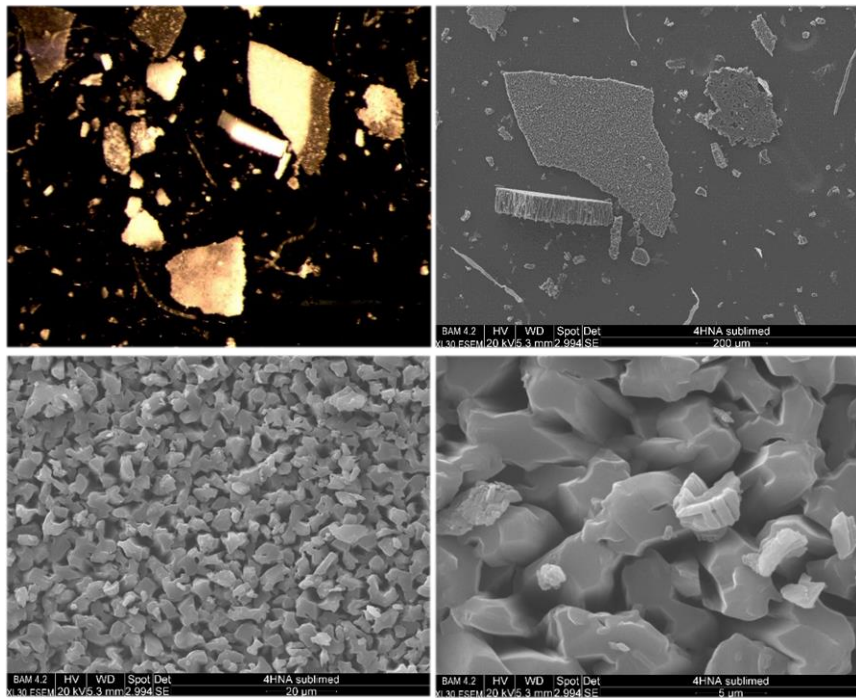



5HNA sublimed

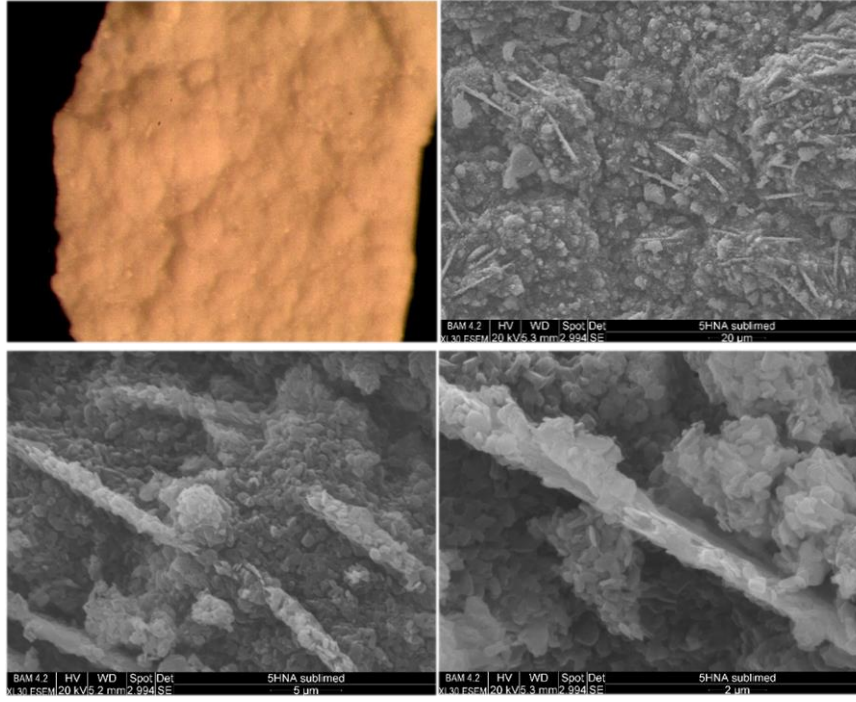

6HNA recrystallized from water

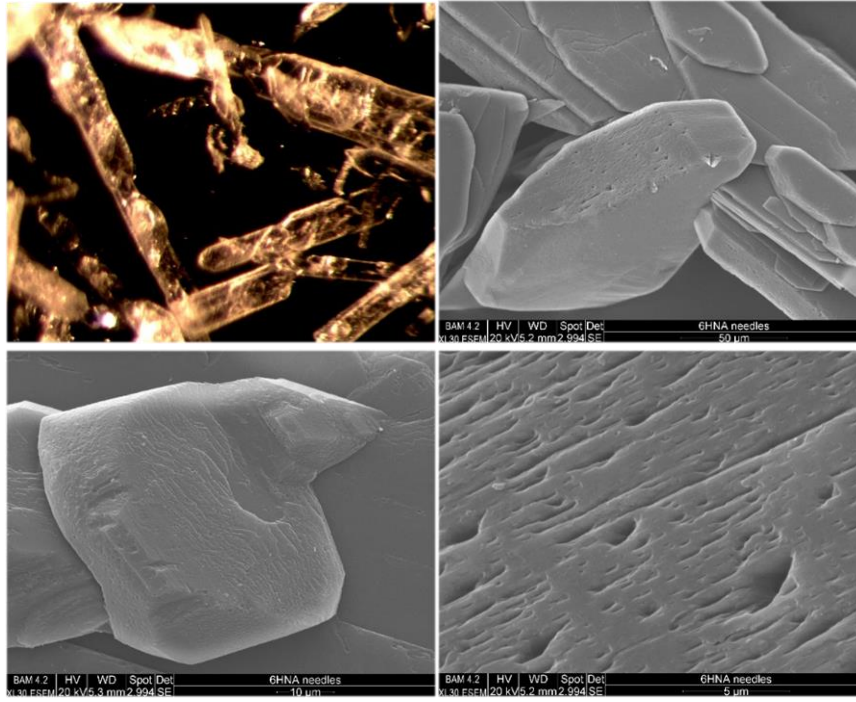



**Table S5**Temperature dependency of the mole fraction ( $x_{\text{HNA}}$ ) equilibrium solubilities of HNAs<sup>a</sup>

|      | H <sub>2</sub> O |                            | EtOH           |                            |
|------|------------------|----------------------------|----------------|----------------------------|
|      | <i>T</i> /K      | 10 <sup>3</sup> · <i>x</i> | <i>T</i> /K    | 10 <sup>3</sup> · <i>x</i> |
| 2HNA | 288.77           | 0.180±0.002(4)             | 285.57         | 0.670±0.074(4)             |
|      | 293.81           | 0.230±0.006(4)             | 288.50         | 0.660±0.037(4)             |
|      | 298.67           | 0.300±0.004(4)             | 295.20         | 0.840±0.038(4)             |
|      | 308.68           | 0.440±0.010(4)             | 300.19         | 0.950±0.046(4)             |
|      | 313.55           | 0.530±0.002(4)             | 303.49         | 1.280±0.026(4)             |
|      | 318.70           | 0.670±0.002(4)             | 308.17         | 1.480±0.063(4)             |
|      | 324.00           | 0.800±0.012(4)             | 313.49         | 1.650±0.017(4)             |
|      |                  |                            | 318.42         | 1.860±0.018(4)             |
|      |                  |                            | 323.48         | 1.940±0.023(4)             |
|      |                  |                            | 333.17         | 2.430±0.100(3)             |
| 4HNA | 287.07           | 0.900±0.008(4)             | 288.55         | 0.690±0.045(4)             |
|      | 290.56           | 0.960±0.042(4)             | 300.08         | 0.940±0.015(4)             |
|      | 293.81           | 1.120±0.009(3)             | 303.46         | 1.280±0.038(4)             |
|      | 298.49           | 1.370±0.010(3)             | 308.02         | 1.390±0.056(4)             |
|      | 303.34           | 1.560±0.009(3)             | 313.29         | 1.670±0.026(4)             |
|      | 312.57           | 2.520±0.137(3)             | 318.24         | 0.730±0.011(4)             |
|      | 317.17           | 2.910±0.159(3)             | 323.24         | 2.220±0.043(4)             |
|      | 322.54           | 3.400±0.190(3)             | 328.14         | 2.780±0.093(4)             |
| 5HNA | 289.10           | 0.110±0.003(4)             | 285.65         | 0.470±0.218(3)             |
|      | 293.87           | 0.130±0.002(4)             | 290.64         | 0.620±0.023(4)             |
|      | 298.71           | 0.150±0.002(4)             | 295.29         | 0.630±0.026(4)             |
|      | 303.70           | 0.170±0.004(4)             | 300.08         | 0.920±0.009(5)             |
|      | 309.25           | 0.210±0.003(4)             | 303.47         | 0.940±0.030(4)             |
|      | 313.61           | 0.245±0.004(4)             | 307.42         | 1.080±0.031(4)             |
|      | 319.00           | 0.280±0.001(4)             | 318.12         | 1.510±0.036(4)             |
|      | 323.86           | 0.320±0.002(4)             | 323.19         | 1.470±0.016(4)             |
|      | 327.81           | 0.360±0.005(4)             | 327.98         | 0.740±0.199(3)             |
|      | 333.59           | 0.430±0.002(4)             |                |                            |
| 6HNA | 288.83           | 0.090±0.004(5)             | 285.78         | 0.390±0.005(5)             |
|      | 293.74           | 0.110±0.002(4)             | 288.65         | 0.410±0.055(4)             |
|      | 298.52           | 0.140±0.003(4)             | 295.31         | 0.510±0.095(4)             |
|      | 303.38           | 0.180±0.003(4)             | 300.08         | 0.530±0.036(4)             |
|      | 308.35           | 0.210±0.008(4)             | 303.45         | 0.660±0.052(4)             |
|      | 318.29           | 0.260±0.004(4)             | 308.35         | 0.770±0.077(4)             |
|      | 322.93           | 0.290±0.002(4)             | 313.32         | 0.890±0.036(4)             |
|      | 327.61           | 0.350±0.005(4)             | 317.97         | 0.990±0.023(4)             |
|      | 333.25           | 0.440±0.001(4)             | 323.04         | 1.010±0.068(4)             |
|      |                  |                            | 327.87         | 1.330±0.020(4)             |
|      |                  | 332.48                     | 1.370±0.092(4) |                            |

<sup>a</sup> The indicated uncertainties in parenthesis relate to twice the standard error of the mean of the number of experiments.

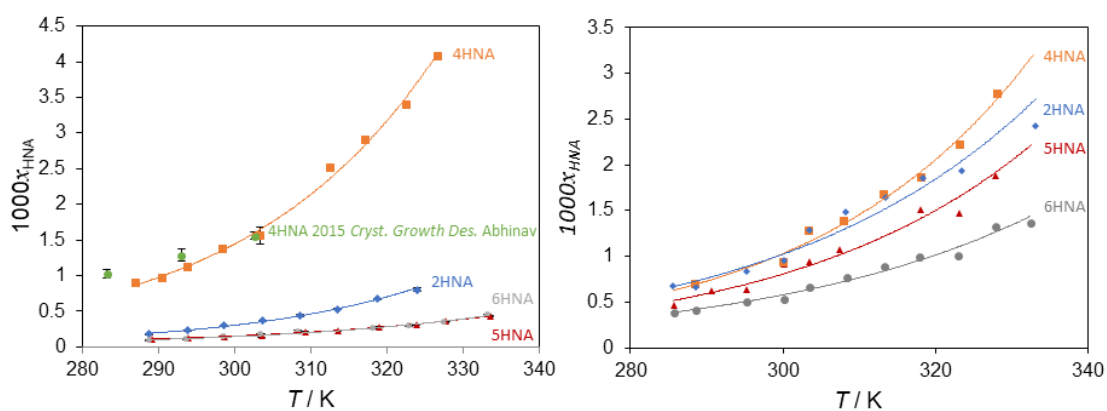

**Fig. S28.** Left: mole fraction solubilities ( $1000x_{HNA}$ ) versus  $T$  plot obtained in this work for water (data for 4HNA in water from reference [4] is also represented); right: and a similar plot attained for ethanol.

**Table S6.** Hydroxynicotinic and nicotinic acids polymorphs

| <b>H<br/>N<br/>A</b> | <b>Form</b> | <b>Polymorph</b> | <b>Crystal system</b> | <b>Space group</b> | <b>a /Å</b> | <b>b /Å</b> | <b>c /Å</b> | <b><math>\alpha</math> /°</b> | <b><math>\beta</math> /°</b> | <b><math>\gamma</math> /°</b> | <b>T/K</b> | <b>Crystallisation solvents</b>                                                                  | <b>Ref.</b> |
|----------------------|-------------|------------------|-----------------------|--------------------|-------------|-------------|-------------|-------------------------------|------------------------------|-------------------------------|------------|--------------------------------------------------------------------------------------------------|-------------|
| <b>2</b>             | oxo         | I                | monoclinic            | $P2_1/n$           | 3.640       | 11.584      | 13.565      | 90                            | 94.64                        | 90                            | 90         | H <sub>2</sub> O                                                                                 | [5]         |
|                      | oxo         | V                | monoclinic            | $P2_1/n$           | 3.7473      | 7.3660      | 20.501      | 90                            | 91.138                       | 90                            | 150        | -                                                                                                | [6]         |
|                      | oxo         | VI               | monoclinic            | $P2_1/c$           | 3.7984      | 7.3494      | 20.3640     | 90                            | 90.17                        | 90                            | 293        | acidic solution (pH 1)                                                                           | [7]         |
|                      | oxo         | VII              | monoclinic            | $P2_1/n$           | 3.8040      | 7.3640      | 20.741      | 90                            | 90.01                        | 90                            | 293        | EtOH                                                                                             | [8],[9]     |
|                      | oxo         | VIII             | monoclinic            | $P2_1/n$           | 3.797       | 7.354       | 20.905      | 90                            | 90.007                       | 90                            | 293        | H <sub>2</sub> O                                                                                 | [3]         |
|                      | oxo         | I (= [5])        | monoclinic            | $P2_1/n$           | 3.640       | 11.584      | 13.565      | 90                            | 94.64                        | 90                            | 90         | MeOH+2-CNA+ <i>p</i> -TsOH, MeOH+DCMA+ <i>p</i> -TsOH, MeOH+HCl, EtOH+HCl, EtOAc+ <i>p</i> -TsOH | [10]        |
|                      | oxo         | II               | monoclinic            | $P2_1/n$           | 3.725       | 7.368       | 20.417      | 90                            | 91.47                        | 90                            | 90         | MeOH, EtOH, H <sub>2</sub> O, <i>i</i> -PrOH, AcO, DMSO, EtOAc, DMF, AcOH, MeOH+2-CNA, MeOH+DCMA | [10]        |
|                      | oxo         | III              | monoclinic            | $P2_1/c$           | 9.997       | 3.754       | 15.362      | 90                            | 106.31                       | 90                            | 90         | H <sub>2</sub> O+ <i>p</i> -TsOH                                                                 | [10]        |
|                      | oxo         | IV               | monoclinic            | $P2_1/c$           | 9.773       | 4.0520      | 14.993      | 90                            | 109.95                       | 90                            | 90         | MeOH+ <i>p</i> -TsOH, EtOH+ <i>p</i> -TsOH, H <sub>2</sub> O+ <i>p</i> -TsOH                     | [10]        |
| <b>4</b>             | oxo         | H-I              | orthorhombic          | $P2_12_12$         | 7.227       | 23.701      | 3.6999      | 90                            | 90                           | 90                            | 296        | 1:2 (v/v) EtOH/H <sub>2</sub> O                                                                  | [11]        |
|                      | oxo         | I                | monoclinic            | $P2_1/c$           | 3.804       | 14.582      | 10.673      | 90                            | 94.254                       | 90                            | 293        | EtOH                                                                                             | [3]         |
|                      | oxo         | II               | orthorhombic          | $Pna2_1$           | 13.4233     | 3.8097      | 11.6150     | 90                            | 90                           | 90                            | 90         | MeOH                                                                                             | [12]        |
|                      | oxo         | III              | monoclinic            | $P2_1/c$           | 3.7198      | 14.5367     | 10.6250     | 90                            | 93.3280                      | 90                            | 90         | AcO, EtOAc, <i>i</i> -PrOH                                                                       | [12]        |
|                      | hydroxy     | IV               | monoclinic            | $Cc$               | 3.6124      | 22.8112     | 13.5495     | 90                            | 89.8980                      | 90                            | 90         | EtOH                                                                                             | [12]        |
|                      | hydroxy     | H-II             | orthorhombic          | $P2_12_12$         | 7.2840      | 23.5200     | 3.6450      | 90                            | 90                           | 90                            | 90         | H <sub>2</sub> O                                                                                 | [12]        |
|                      | oxo         | H-III            | monoclinic            | $P2_1/c$           | 7.8418      | 12.6104     | 7.2017      | 90                            | 113.9211                     | 90                            | 90         | H <sub>2</sub> O                                                                                 | [12]        |
| <b>5</b>             | zwitt. 2    | H-I              | monoclinic            | $P2_1/c$           | 4.504       | 16.389      | 8.856       | 90                            | 91.271                       | 90                            | 167        | H <sub>2</sub> O                                                                                 | [2]         |

|          |         |      |            |                         |           |            |           |         |             |                  |      |                  |      |
|----------|---------|------|------------|-------------------------|-----------|------------|-----------|---------|-------------|------------------|------|------------------|------|
|          | zwitt.2 | H-II | monoclinic | <i>P2<sub>1</sub>/c</i> | 4.4942    | 16.396     | 9.0283    | 90      | 89.977      | 90               | 296  | H <sub>2</sub> O | [2]  |
|          | hydroxy | S-I  | monoclinic | <i>P2<sub>1</sub>/c</i> | 5.2351    | 22.4779    | 8.4174    | 90      | 94.301      | 90               | 167  | DMSO             | [2]  |
|          | hydroxy | S-II | monoclinic | <i>P2<sub>1</sub>/c</i> | 5.2638    | 22.580     | 8.5353    | 90      | 93.269      | 90               | 296  | DMSO             | [2]  |
| <b>6</b> | oxo     | I    | triclinic  | <i>P-1</i>              | 6.8130    | 11.1340    | 16.2780   | 82.5570 | 78.106      | 76.2             | 90   | DMSO             | [13] |
|          | oxo     | II   | triclinic  | <i>P-1</i>              | 6.976     | 11.231     | 16.290    | 82.553  | 78.279      | 51<br>75.1<br>66 | 293  | H <sub>2</sub> O | [3]  |
| <b>N</b> |         | I    | monoclinic | <i>P2<sub>1</sub>/c</i> | 7.175(2)  | 11.682(2)  | 7.220(2)  | 90      | 113.38(5)   | 90               | r.t. | –                | [14] |
| <b>A</b> |         | “    | “          | <i>P2<sub>1</sub>/c</i> | 7.162     | 11.703     | 7.242     | 90      | 113.2       | 90               | r.t. | –                | [15] |
|          |         | “    | “          | <i>P2<sub>1</sub>/c</i> | 7.186(2)  | 11.688(3)  | 7.231(2)  | 90      | 113.55(6)   | 90               | r.t. | –                | [16] |
|          |         | “    | “          | <i>P2<sub>1</sub>/c</i> | 7.303(11) | 11.693(2)  | 7.33(3)   | 90      | 113.68(14)  | 90               | r.t. | –                | [17] |
|          |         | “    | “          | <i>P2<sub>1</sub>/c</i> | 7.41(3)   | 11.692(2)  | 7.377(11) | 90      | 114.45(14)  | 90               | r.t. | –                | [17] |
|          |         | “    | “          | <i>P2<sub>1</sub>/c</i> | 7.1672(5) | 11.6710(6) | 7.1057(6) | 90      | 114.785(10) | 90               | 150  | Oil droplets     | [18] |

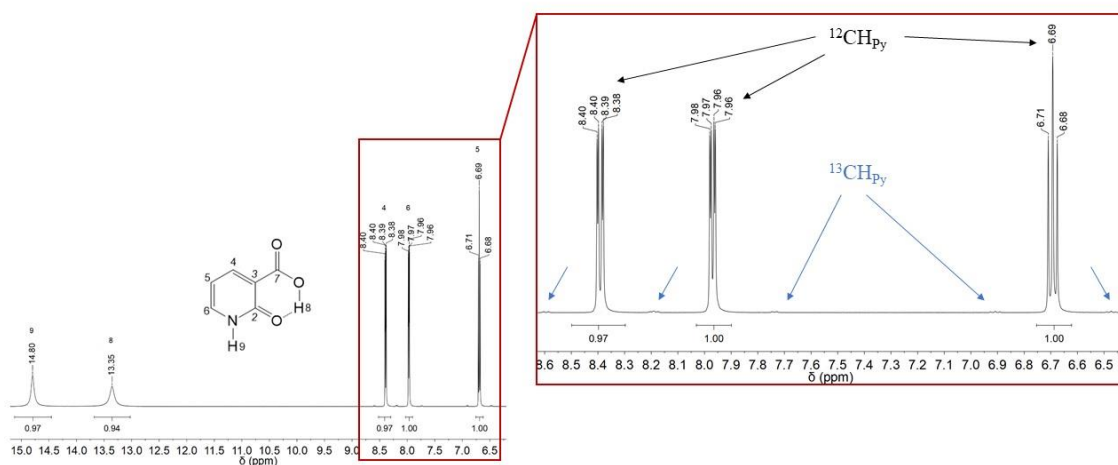

**Fig. S29.** <sup>1</sup>H NMR spectrum of 2HNA in DMSO-*d*<sub>6</sub> with a zoom detail for the coupling displayed by the <sup>12</sup>CH<sub>Py</sub> resonances (please note that the satellite peaks present near the baseline are due to the <sup>13</sup>CH<sub>Py</sub> which exist with the natural abundance of 1 %).

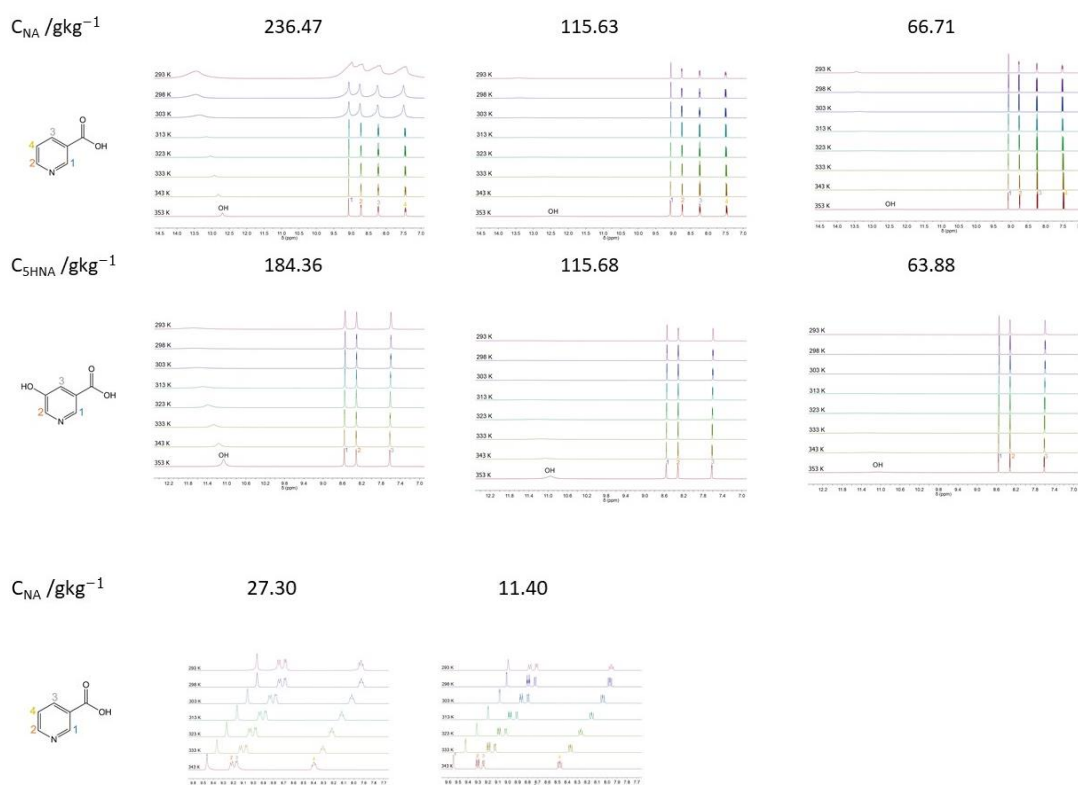

**Fig. S30.** <sup>1</sup>H-NMR spectra for the cooling crystallisation of nicotinic acid in DMSO-*d*<sub>6</sub> (top) and D<sub>2</sub>O (bottom), and of 5-hydroxynicotinic acid in DMSO-*d*<sub>6</sub> (middle), at different concentrations.

## References

- [1] C.E.S. Bernardes, EASY GRAPH II. <<https://webpages.ciencias.ulisboa.pt/~cebernardes/EasyGraph/Software-win-EG.html>>, 2019.
- [2] A. Joseph, J.S. Rodrigues Alves, C.E.S. Bernardes, M.F.M. Piedade, M.E. Minas da Piedade, *Crystengcomm* 21 (2019) 2220-2233.
- [3] R.C. Santos, R.M. Figueira, M.F. Piedade, H.P. Diogo, M.E. Minas da Piedade, *J. Phys. Chem. B* 113 (2009) 14291-14309.
- [4] A. Joseph, C.E.S. Bernardes, A.S. Viana, M.F.M. Piedade, M.E.M. da Piedade, *Cryst. Growth. Des.* 15 (2015) 3511-3524.
- [5] S. Long, M. Siegler, T. Li, *Acta Cryst. Sec. E* 62 (2006) o5664-o5665.
- [6] S. Djurdjevic, D. Leigh, S. Parsons, CCDC 660787: Experimental Crystal Structure Determination, 2008.
- [7] B.-M. Kukovec, Z. Popović, G. Pavlović, M. Rajić Linarić, *J. Mol. Struct.* 882 (2008) 47-55.
- [8] J. Miklovič, P. Segľa, D. Mikloš, J. Titiš, R. Herchel, M. Melník, (2010).
- [9] J. Miklovič, P. Segľa, D. Mikloš, J. Titiš, R. Herchel, M. Melník, *Chem. Papers* 62 (2008).
- [10] S.H. Long, P.P. Zhou, K.L. Theiss, M.A. Siegler, T.L. Li, *Crystengcomm* 17 (2015) 5195-5205.
- [11] E.P. Matias, C.E.S. Bernardes, M.F.M. Piedade, M.E.M. da Piedade, *Cryst. Growth. Des.* 11 (2011) 2803-2810.
- [12] S.H. Long, M.T. Zhang, P.P. Zhou, F.Q. Yu, S. Parkin, T.L. Li, *Cryst. Growth. Des.* 16 (2016) 2573-2580.
- [13] S. Gupta, S. Long, T. Li, *Acta Cryst. Sec. E* 63 (2007) o2784-o2784.
- [14] W.B. Wright, G.S.D. King, *Acta Crystallographica* 6 (1953) 305-317.
- [15] M.P. Gupta, P. Kumar, *Crystal Struct. Commun.* (1975) 365.
- [16] A. Kutoglu, C. Scherlinger, *Acta Crystallographica Section C Crystal Structure Communications* 39 (1983) 232-234.
- [17] E. van Genderen, M.T. Clabbers, P.P. Das, A. Stewart, I. Nederlof, K.C. Barentsen, Q. Portillo, N.S. Pannu, S. Nicolopoulos, T. Gruene, J.P. Abrahams, *Acta Crystallogr A Found Adv* 72 (2016) 236-242.
- [18] A.R. Tyler, R. Ragbirsingh, C.J. McMonagle, P.G. Waddell, S.E. Heaps, J.W. Steed, P. Thaw, M.J. Hall, M.R. Probert, *Chem* 6 (2020) 1755-1765.
